# Supplementary material for: Synthesis of 2-substituted quinazolinesvia iridium catalysis
Source: Royal Society of Chemistry journal article supplement (doi:10.1039/c2ra22278g), 2012-11-06

Supporting Information

# One-pot Synthesis of Quinazolines via Hyrdogen-Transfer Catalysis

Jie Fang<sup>a</sup>, Jianguang Zhou<sup>a\*</sup> and Zhijie Fang<sup>b</sup>

<sup>a</sup>Chemical and Analytical Development, Suzhou Novartis Pharma Technology Co. Ltd,  
Changshu, Jiangsu, China 215537

<sup>b</sup>School of Chemical Engineering, Nanjing University of Science & Technology,  
Nanjing, Jiangsu, China 210094

Email: [jianguang.zhou@novartis.com](mailto:jianguang.zhou@novartis.com)

|                                                                                                                 |    |
|-----------------------------------------------------------------------------------------------------------------|----|
| Experimental section.....                                                                                       | S2 |
| Characterization data of <b>3</b> , <b>4</b> , <b>5</b> , <b>9</b> and <b>10</b> .....                          | S4 |
| <sup>1</sup> H and <sup>13</sup> C NMR spectra of <b>3</b> , <b>4</b> , <b>5</b> , <b>9</b> and <b>10</b> ..... | S8 |

## Experimental Section

All reactions were carried out under nitrogen. Proton and carbon magnetic resonance spectra ( $^1\text{H}$  NMR and  $^{13}\text{C}$  NMR) were recorded using tetramethylsilane (TMS) in the solvent of  $\text{CDCl}_3$  as the internal standard ( $^1\text{H}$  NMR: TMS at 0.00 ppm,  $\text{CHCl}_3$  at 7.26 ppm;  $^{13}\text{C}$  NMR:  $\text{CDCl}_3$  at 77.4 ppm) or were recorded using tetramethylsilane (TMS) in the solvent of  $\text{DMSO}-d_6$  as the internal standard ( $^1\text{H}$  NMR: TMS at 0.00 ppm,  $\text{DMSO}$  at 2.50 ppm;  $^{13}\text{C}$  NMR:  $\text{DMSO}$  at 39.5 ppm). Melting points are uncorrected. Column chromatographic separations were carried out on ACME silica gel (200 - 300 mesh) using petroleum ether and EtOAc as eluent. All solvents were purified and dried using standard procedures.

### General Methods for the Synthesis of Quinazolines between 1 and 2

**1** (1 mmol), aldehyde **2** (1 mmol), styrene (4 mmol),  $[\text{Cp}^*\text{IrCl}_2]_2$  (0.025 mmol) and anhydrous xylene (2 mL) were added to an oven-dried carousel tube. Then the system was degassed and filled with nitrogen. The reaction mixture was stirred and heated to reflux for 24h. After completion of the reaction, the resulting solution was cooled to room temperature, and the solvent was removed with the aid of a rotary evaporator. The residue was purified by column chromatography on silica gel using petroleum ether/ethyl acetate (10:1 to 5:1) as the eluent to provide the desired products **4**.

### Optimization of the conditions

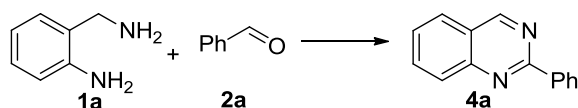

Table 1<sup>a</sup>

|           | Catalyst                                                 | Additive                        | Acceptor       | Solvent | Yield <sup>b</sup> |
|-----------|----------------------------------------------------------|---------------------------------|----------------|---------|--------------------|
| <b>1</b>  | $[\text{Cp}^*\text{IrCl}_2]_2$                           | No                              | No             | xylene  | 10%                |
| <b>2</b>  | $[\text{Cp}^*\text{IrCl}_2]_2$                           | No                              | styrene        | xylene  | 66% <sup>c</sup>   |
| <b>3</b>  | $[\text{Cp}^*\text{IrCl}_2]_2$                           | No                              | E-crotonitrile | xylene  | 50% <sup>c</sup>   |
| <b>4</b>  | $[\text{Cp}^*\text{IrCl}_2]_2$                           | AcOH 0.2 eq.                    | styrene        | xylene  | 43%                |
| <b>5</b>  | $[\text{Cp}^*\text{IrCl}_2]_2$                           | KOH 0.2 eq.                     | styrene        | xylene  | 54%                |
| <b>6</b>  | $[\text{Cp}^*\text{IrCl}_2]_2$                           | <i>t</i> -BuONa 0.2 eq.         | styrene        | xylene  | 60%                |
| <b>7</b>  | $[\text{Cp}^*\text{IrCl}_2]_2$                           | $\text{K}_2\text{CO}_3$ 0.2 eq. | styrene        | xylene  | 46%                |
| <b>8</b>  | $[\text{Cp}^*\text{IrCl}_2]_2$                           | No                              | styrene        | toluene | 35%                |
| <b>9</b>  | $[\text{Cp}^*\text{IrCl}_2]_2$                           | No                              | styrene        | DMF     | 50%                |
| <b>10</b> | $[\text{Cp}^*\text{IrI}_2]_2$                            | No                              | styrene        | xylene  | 57%                |
| <b>11</b> | $\text{RuCl}_2(\text{PPh}_3)_3$                          | KOH 0.2 eq.                     | styrene        | xylene  | 26%                |
| <b>12</b> | $[\text{Ru}(p\text{-cymene})\text{Cl}_2]_2$ <sup>d</sup> | KOH 0.2 eq.                     | styrene        | xylene  | 52%                |
| <b>13</b> | $[\text{Cp}^*\text{IrCl}_2]_2$                           | 4A MS 2 eq.                     | styrene        | xylene  | 51%                |

<sup>a</sup> Conditions: **1a** (0.5 mmol), **2a** (0.5 mmol), catalyst (2.5 mol%), styrene (4.0 eq.) in refluxing temperature of solvent (1 mL) under N<sub>2</sub>, 24 h. <sup>b</sup> H-NMR yield. <sup>c</sup> Isolated yield. <sup>d</sup> 2.5 mol% dppf was added.

### Synthesis of quinazolines form alcohol **1a** and **7**

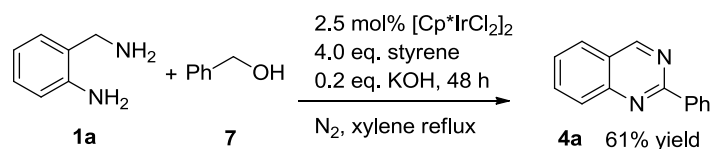

**Table 2<sup>a</sup>**

|          | Catalyst                                                          | Additive                | Acceptor | Solvent | Yield <sup>b</sup> |
|----------|-------------------------------------------------------------------|-------------------------|----------|---------|--------------------|
| <b>1</b> | [Cp*IrCl <sub>2</sub> ] <sub>2</sub>                              | No                      | styrene  | xylene  | 10%                |
| <b>2</b> | [Cp*IrCl <sub>2</sub> ] <sub>2</sub>                              | KOH 0.2 eq.             | styrene  | xylene  | 61% <sup>c</sup>   |
| <b>3</b> | [Cp*IrCl <sub>2</sub> ] <sub>2</sub>                              | NaOH 0.2 eq.            | styrene  | xylene  | 57%                |
| <b>4</b> | [Cp*IrCl <sub>2</sub> ] <sub>2</sub>                              | <i>t</i> -BuONa 0.2 eq. | styrene  | xylene  | 50%                |
| <b>5</b> | RuCl <sub>2</sub> (PPh <sub>3</sub> ) <sub>3</sub>                | KOH 0.2 eq.             | styrene  | xylene  | 46%                |
| <b>6</b> | [Ru( <i>p</i> -cymene)Cl <sub>2</sub> ] <sub>2</sub> <sup>d</sup> | KOH 0.2 eq.             | styrene  | xylene  | 42%                |

<sup>a</sup> Conditions: **1a** (0.5 mmol), **2a** (0.5 mmol), catalyst (2.5 mol%), acceptor (4.0 eq.), base (20 mol%) in refluxing temperature of solvent (1 mL) under N<sub>2</sub>, 48 h. <sup>b</sup> H-NMR yield. <sup>c</sup> Isolated yield. <sup>d</sup> 2.5 mol% dppf was added.

2-aminobenzylamines **1a** (122 mg, 1 mmol), phenylmethanol **2** (108 mg, 1 mmol), styrene (416 mg, 4 mmol), [Cp\*IrCl<sub>2</sub>]<sub>2</sub> (20 mg, 0.025 mmol), KOH (11 mg, 0.2 mmol) and anhydrous xylene (2 mL) were added to an oven-dried carousel tube. Then the system was degassed and filled with nitrogen. The reaction mixture was stirred and heated to reflux for 48h. After completion of the reaction, the resulting solution was cooled to room temperature, and the solvent was removed with the aid of a rotary evaporator. The residue was purified by column chromatography on silica gel using petroleum ether/ethyl acetate (10:1 to 5:1) as the eluent to provide the desired products **4a** (slight yellow solid, 127 mg, 61% yield).

### Synthesis of 2-phenyl-4H-benzo[d][1,3]oxazine form aldehyde **2a** and **8**

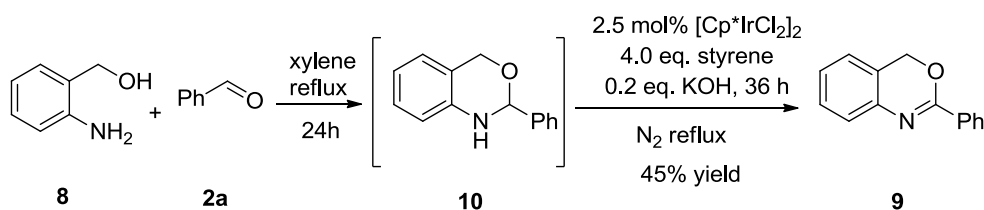

**Table 3**

|          | Catalyst                             | Additive                | Acceptor        | Solvent | Yield <sup>a</sup> |
|----------|--------------------------------------|-------------------------|-----------------|---------|--------------------|
| <b>1</b> | [Cp*IrCl <sub>2</sub> ] <sub>2</sub> | No                      | Styrene 4.0 eq. | xylene  | 40%                |
| <b>2</b> | [Cp*IrCl <sub>2</sub> ] <sub>2</sub> | KOH 0.2 eq.             | Styrene 4.0 eq. | xylene  | 45% <sup>b</sup>   |
| <b>3</b> | [Cp*IrCl <sub>2</sub> ] <sub>2</sub> | <i>t</i> -BuONa 0.2 eq. | Styrene 4.0 eq. | xylene  | 38%                |
| <b>4</b> | [Cp*IrCl <sub>2</sub> ] <sub>2</sub> | <i>p</i> -TsOH 0.2 eq.  | Styrene 4.0 eq. | xylene  | 39%                |

<sup>a</sup> H-NMR yield. <sup>b</sup> Isolated yield.

(2-aminophenyl) methanol **8** (123 mg, 1 mmol), benzaldehyde **2a** (106 mg, 1 mmol) and anhydrous xylene (2 mL) were added to an oven-dried carousel tube. Then the system was degassed and filled with nitrogen. The reaction mixture was stirred and heated to reflux for 24h, the reaction was cooled to room temperature, styrene (416 mg, 4 mmol), [Cp\*IrCl<sub>2</sub>]<sub>2</sub> (20 mg, 0.025 mmol), KOH (11 mg, 0.2 mmol) were added, the mixture was stirred and heated to reflux for 24h, the resulting solution was cooled to room temperature, and the solvent was removed with the aid of a rotary evaporator. The residue was purified by column chromatography on silica gel using petroleum ether/ethyl acetate (10:1 to 5:1) as the eluent to provide the desired products **9** (slight yellow solid, 94 mg, 45% yield).

### Characterization Data of 3, 4, 5, 9 and 10

**2-phenyl-1,2,3,4-tetrahydroquinazoline (3a)**. White solid, mp: 102 °C - 103 °C (lit.<sup>1</sup> 102 °C - 105 °C). <sup>1</sup>H NMR (CDCl<sub>3</sub> - *d*<sub>3</sub>, 400 MHz): δ 7.40 (d, *J* = 8.0 Hz, 2H), 7.25 - 7.31 (m, 3H), 6.95 (t, *J* = 8.0 Hz, 1H), 6.84 (d, *J* = 8.0 Hz, 1H), 6.62 (t, *J* = 8.0 Hz, 1H), 6.47 (d, *J* = 8.0, 1H), 5.11 (s, 1H), 4.13 (d, *J* = 16, 1H), 4.10 (br, 1H), 3.86 (d, *J* = 16, 1H), 1.81 (br, 1H). <sup>13</sup>C NMR (CDCl<sub>3</sub> - *d*<sub>3</sub>, 100 MHz): δ 143.7, 141.6, 128.7, 128.5, 126.6, 126.2, 121.3, 118.1, 115.0, 69.6, 46.5. HRMS (ESI): [M + H]<sup>+</sup>: C<sub>14</sub>H<sub>15</sub>N<sub>2</sub> Calcd for 211.1235. Found: 211.1276.

**2-phenylquinazoline (4a)**. Pale yellow solid, mp: 96 °C - 98 °C (lit.<sup>2</sup> 97 °C - 98 °C). <sup>1</sup>H NMR (CDCl<sub>3</sub> - *d*<sub>3</sub>, 400 MHz): δ 9.37 (s, 1H), 8.54 (d, *J* = 8.0, 2H), 8.00 (d, *J* = 8.0, 1H), 8.79 - 8.84 (m, 2H), 7.42 - 7.53 (m, 4H). <sup>13</sup>C NMR (CDCl<sub>3</sub> - *d*<sub>3</sub>, 100 MHz): δ 161.0, 160.5, 150.8, 138.0, 134.1, 130.6, 128.6, 127.2, 127.1, 123.6. HRMS (ESI): [M + H]<sup>+</sup>: C<sub>14</sub>H<sub>11</sub>N<sub>2</sub> Calcd for 207.0922. Found: 207.0910.

**2-(3-chlorophenyl)quinazoline (4b)**. pale yellow solid, mp: 148 °C - 149 °C (lit.<sup>3</sup> 148 °C - 150 °C). <sup>1</sup>H NMR (CDCl<sub>3</sub> - *d*<sub>3</sub>, 400 MHz): δ 9.46 (s, 1H), 8.63 (s, 1H), 8.49 - 8.51 (m, 1H), 8.09 (d, *J* = 8.0, 1H), 7.91 - 7.95 (m, 2H), 7.64 (t, *J* = 8.0, 1H), 7.46 - 7.48 (m, 2H). <sup>13</sup>C NMR (CDCl<sub>3</sub> - *d*<sub>3</sub>, 100 MHz): δ 160.5, 159.7, 150.6, 139.8, 134.7, 134.3, 130.5, 129.8, 128.7, 128.6, 127.6, 127.1, 126.6, 123.7. HRMS (ESI): [M + H]<sup>+</sup>: C<sub>14</sub>H<sub>10</sub>N<sub>2</sub>Cl Calcd for 241.0533. Found: 241.0522.

**2-(3-bromophenyl)quinazoline (4c)**. Yellow solid, mp: 154 °C - 156 °C (lit.<sup>3</sup> 153 °C - 155 °C). <sup>1</sup>H NMR (CDCl<sub>3</sub> - *d*<sub>3</sub>, 400 MHz): δ 9.46 (s, 1H), 8.79 (s, 1H), 8.09 (d, *J* = 8.0, 1H), 7.90 - 7.94 (m, 2H), 7.62 - 7.65 (m, 2H), 7.40 (t, *J* = 8.0, 1H). <sup>13</sup>C NMR (CDCl<sub>3</sub> - *d*<sub>3</sub>, 100 MHz): δ 160.5, 159.5, 150.6,

140.0, 134.3, 133.4, 131.5, 130.1, 128.8, 127.6, 127.1, 127.0, 123.7, 122.9. HRMS (ESI):  $[M + H]^+$ :  $C_{14}H_{10}N_2Br$  Calcd for 285.0027. Found: 241.0007.

**2-(3-nitrophenyl)quinazoline (4d)**. Yellow solid, mp: 160 °C - 162 °C (lit.<sup>4</sup> 162 °C - 163 °C). <sup>1</sup>H NMR (CDCl<sub>3</sub> - *d*<sub>3</sub>, 400 MHz):  $\delta$  9.51 (s, 1H), 9.50 (s, 1H), 8.98 (d, *J* = 8.0, 1H), 8.35 (d, *J* = 8.0, 1H), 8.14 (d, *J* = 8.0, 1H), 7.96 - 8.00 (m, 2H), 7.67 - 7.73 (m, 2H). <sup>13</sup>C NMR (CDCl<sub>3</sub> - *d*<sub>3</sub>, 100 MHz):  $\delta$  160.7, 158.7, 150.6, 148.5, 139.9, 134.5, 134.2, 129.5, 128.7, 127.2, 125.0, 123.9, 123.6. HRMS (ESI):  $[M + H]^+$ :  $C_{14}H_{10}N_3O_2$  Calcd for 252.0773. Found: 252.0756.

**2-(m-tolyl)quinazoline (4e)**. Yellow solid, mp: 97 °C - 98 °C. <sup>1</sup>H NMR (CDCl<sub>3</sub> - *d*<sub>3</sub>, 400 MHz):  $\delta$  9.44 (s, 1H), 9.40 - 9.43 (m, 2H), 8.08 (d, *J* = 8.0, 1H), 7.86 - 7.90 (m, 2H), 7.58 (t, *J* = 8.0, 1H), 7.43 (t, *J* = 8.0, 1H), 7.32 (d, *J* = 8.0, 1H), 2.48 (s, 3H). <sup>13</sup>C NMR (CDCl<sub>3</sub> - *d*<sub>3</sub>, 100 MHz):  $\delta$  161.2, 160.4, 150.7, 138.2, 137.9, 134.0, 131.4, 129.1, 128.6, 128.5, 127.2, 127.1, 125.8, 123.5, 21.5. HRMS (ESI):  $[M + H]^+$ :  $C_{15}H_{13}N_2$  Calcd for 221.1079. Found: 221.1057.

**2-(3-methoxyphenyl)quinazoline (4f)**. Pale yellow solid, mp: 89 °C - 90 °C. <sup>1</sup>H NMR (CDCl<sub>3</sub> - *d*<sub>3</sub>, 400 MHz):  $\delta$  9.46 (s, 1H), 8.23 (d, *J* = 8.0, 1H), 8.17 - 8.19 (m, 1H), 7.88 - 7.93 (m, 2H), 7.61 (t, *J* = 8.0, 1H), 7.45 (t, *J* = 8.0, 1H), 7.07 (d, *J* = 8.0, 1H), 3.95 (s, 3H). <sup>13</sup>C NMR (CDCl<sub>3</sub> - *d*<sub>3</sub>, 100 MHz):  $\delta$  160.8, 160.4, 160.0, 150.7, 139.5, 134.1, 129.6, 128.6, 127.3, 127.1, 123.6, 121.1, 117.2, 113.0. HRMS (ESI):  $[M + H]^+$ :  $C_{15}H_{13}N_2O$  Calcd for 237.1028. Found: 237.1016.

**2-(4-fluorophenyl)quinazoline (4g)**. White solid, mp: 128 °C - 130 °C (lit.<sup>2</sup> 129 °C - 130). <sup>1</sup>H NMR (CDCl<sub>3</sub> - *d*<sub>3</sub>, 400 MHz):  $\delta$  9.43 (s, 1H), 8.61 - 8.64 (m, 2H), 8.06 (d, *J* = 8.0, 1H), 7.88 - 7.92 (m, 2H), 7.59 - 7.62 (m, 1H), 7.18 - 7.22 (m, 2H). <sup>13</sup>C NMR (CDCl<sub>3</sub> - *d*<sub>3</sub>, 100 MHz):  $\delta$  165.9, 163.4, 160.5, 160.1, 150.7, 134.2, 130.7, 130.6, 128.5, 127.2, 127.1, 123.4, 115.6, 115.4. HRMS (ESI):  $[M + H]^+$ :  $C_{14}H_{10}N_2F$  Calcd for 225.0828. Found: 225.0887.

**2-(4-bromophenyl)quinazoline (4h)**. White solid, mp: 121 °C - 123 °C (lit.<sup>2</sup> 120 °C - 121 °C). <sup>1</sup>H NMR (CDCl<sub>3</sub> - *d*<sub>3</sub>, 400 MHz):  $\delta$  9.45 (s, 1H), 8.50 (d, *J* = 8.0, 2H), 8.07 (d, *J* = 8.0, 1H), 7.90 - 7.94 (m, 2H), 7.66 (d, *J* = 8.0, 2H), 7.61 - 7.65 (m, 1H), 7.59 - 7.62 (m, 1H). <sup>13</sup>C NMR (CDCl<sub>3</sub> - *d*<sub>3</sub>, 100 MHz):  $\delta$  160.5, 160.1, 150.7, 136.9, 134.2, 131.8, 130.1, 128.6, 127.5, 127.1, 124.4, 123.6. HRMS (ESI):  $[M + H]^+$ :  $C_{14}H_{10}N_2Br$  Calcd for 285.0027. Found: 285.0025.

**2-(4-nitrophenyl)quinazoline (4i)**. White solid, mp: 219 °C - 221 °C (lit.<sup>2</sup> 218 °C - 219 °C). <sup>1</sup>H NMR (CDCl<sub>3</sub> - *d*<sub>3</sub>, 400 MHz):  $\delta$  9.52 (s, 1H), 8.82 (d, *J* = 8.0, 2H), 8.37 (d, *J* = 8.0, 2H), 8.14 (d, *J* = 8.0, 1H), 7.96 - 8.00 (m, 2H), 7.69 - 7.73 (m, 1H). <sup>13</sup>C NMR (CDCl<sub>3</sub> - *d*<sub>3</sub>, 100 MHz):  $\delta$  160.7, 158.8, 150.6, 149.2, 143.8, 134.6, 129.4, 128.8, 128.3, 127.2, 123.8, 123.7. HRMS (ESI):  $[M + H]^+$ :  $C_{14}H_{10}N_3O_2$  Calcd for 252.0773. Found: 272.0758.

**2-(p-tolyl)quinazoline (4j)**. White solid, mp: 98 °C - 99 °C (lit.<sup>2</sup> 97 °C - 98). <sup>1</sup>H NMR (CDCl<sub>3</sub> - *d*<sub>3</sub>, 400 MHz):  $\delta$  9.42 (s, 1H), 8.51 (d, *J* = 8.0, 2H), 8.05 (d, *J* = 8.0, 1H), 7.84 - 7.88 (m, 2H), 7.55 (t, *J* = 8.0,

1H), 7.33 (d,  $J = 8.0$ , 2H), 2.43 (s, 3H).  $^{13}\text{C}$  NMR ( $\text{CDCl}_3 - d_3$ , 100 MHz):  $\delta$  161.1, 160.4, 150.8, 140.8, 135.3, 134.0, 129.4, 128.5, 127.0, 123.5, 21.5. HRMS (ESI):  $[\text{M} + \text{H}]^+$ :  $\text{C}_{15}\text{H}_{13}\text{N}_2$  Calcd for 221.1079. Found: 221.1052.

**2-(furan-2-yl)quinazoline (4k)**. Brown liquid.  $^1\text{H}$  NMR ( $\text{CDCl}_3 - d_3$ , 400 MHz):  $\delta$  9.36 (s, 1H), 8.09 (d,  $J = 8.0$ , 1H), 7.86 - 7.90 (m, 2H), 7.69 (s, 1H), 7.57 (t,  $J = 4.0$ , 1H), 7.46 (d,  $J = 4.0$ , 1H).  $^{13}\text{C}$  NMR ( $\text{CDCl}_3 - d_3$ , 100 MHz):  $\delta$  160.6, 154.0, 152.4, 150.3, 145.3, 134.4, 128.3, 127.2, 123.3, 114.0, 111.2. HRMS (ESI):  $[\text{M} + \text{H}]^+$ :  $\text{C}_{12}\text{H}_9\text{N}_2\text{O}$  Calcd for 197.0715. Found: 197.0695.

**2-benzylquinazoline (4l)**. Slight yellow solid, mp: 68 °C - 69 °C (lit.<sup>6</sup> 70 - 71 °C).  $^1\text{H}$  NMR ( $\text{CDCl}_3 - d_3$ , 400 MHz):  $\delta$  9.33 (s, 1H), 8.01 (d,  $J = 8.0$ , 1H), 7.87 - 7.89 (m, 2H), 7.58 (t,  $J = 8.0$ , 1H), 7.43 (d,  $J = 8.0$ , 2H), 7.30 (t,  $J = 8.0$ , 2H), 7.19 - 7.22 (m, 1H), 4.46 (s, 2H).  $^{13}\text{C}$  NMR ( $\text{CDCl}_3 - d_3$ , 100 MHz):  $\delta$  166.1, 160.8, 150.4, 138.5, 134.1, 129.2, 128.5, 128.1, 127.2, 127.0, 126.5, 123.1. HRMS (ESI):  $[\text{M} + \text{H}]^+$ :  $\text{C}_{15}\text{H}_{13}\text{N}_2$  Calcd for 221.1079. Found: 221.1019.

**2-pentylquinazoline (4m)**. Pale yellow liquid.  $^1\text{H}$  NMR ( $\text{CDCl}_3 - d_3$ , 400 MHz):  $\delta$  9.35 (s, 1H), 7.98 (d,  $J = 8.0$ , 1H), 7.85 - 7.89 (m, 2H), 7.58 (t,  $J = 8.0$ , 1H), 3.12 (t,  $J = 8.0$ , 2H), 1.89 - 1.97 (m, 2H), 1.36 - 1.45 (m, 4H), 0.91 (t,  $J = 8.0$ , 3H).  $^{13}\text{C}$  NMR ( $\text{CDCl}_3 - d_3$ , 100 MHz):  $\delta$  167.9, 160.3, 150.0, 133.9, 127.8, 127.0, 126.8, 123.0, 39.9, 31.7, 28.7, 22.5, 14.0. HRMS (ESI):  $[\text{M} + \text{H}]^+$ :  $\text{C}_{13}\text{H}_{17}\text{N}_2$  Calcd for 201.1392. Found: 201.1387.

**5-fluoro-2-phenylquinazoline (4n)**. Pale yellow solid, mp: 100 °C - 102 °C (lit.<sup>2</sup> 101 - 102 °C).  $^1\text{H}$  NMR ( $\text{CDCl}_3 - d_3$ , 400 MHz):  $\delta$  9.73 (s, 1H), 8.61 - 8.63 (m, 2H), 7.79 - 7.89 (m, 2H), 7.52 - 7.57 (m, 3H), 7.20 - 7.25 (m, 1H).  $^{13}\text{C}$  NMR ( $\text{CDCl}_3 - d_3$ , 100 MHz):  $\delta$  161.7, 158.2 (d,  $J = 250$ , 1C), 154.8, 151.5, 137.5, 134.1, 131.0, 128.6, 124.6, 114.4, 110.0. HRMS (ESI):  $[\text{M} + \text{H}]^+$ :  $\text{C}_{14}\text{H}_{10}\text{FN}_2$  Calcd for 225.0828. Found: 225.0815.

**2-(4-bromophenyl)-5-fluoroquinazoline (4o)**. Pale yellow solid, mp: 176 °C - 177 °C.  $^1\text{H}$  NMR ( $\text{CDCl}_3 - d_3$ , 400 MHz):  $\delta$  9.70 (s, 1H), 8.49 (d,  $J = 8.0$ , 2H), 7.82 - 7.87 (m, 2H), 7.65 (d,  $J = 8.0$ , 2H), 7.22 - 7.26 (m, 1H).  $^{13}\text{C}$  NMR ( $\text{CDCl}_3 - d_3$ , 100 MHz):  $\delta$  160.7, 158.0 (d,  $J = 260$ , 1C), 154.9, 151.2, 136.5, 134.2, 131.8, 130.2, 125.8, 124.5, 114.4, 111.3. HRMS (ESI):  $[\text{M} + \text{H}]^+$ :  $\text{C}_{14}\text{H}_9\text{FBrN}_2$  Calcd for 302.9933. Found: 302.9927.

**5-fluoro-2-(p-tolyl)quinazoline (4p)**. Pale yellow solid, mp: 132 °C - 133 °C.  $^1\text{H}$  NMR ( $\text{CDCl}_3 - d_3$ , 400 MHz):  $\delta$  9.71 (s, 1H), 8.51 (d,  $J = 8.0$ , 2H), 7.81 - 7.87 (m, 2H), 7.34 (d,  $J = 8.0$ , 2H), 7.19 - 7.21 (m, 1H), 2.45 (s, 3H).  $^{13}\text{C}$  NMR ( $\text{CDCl}_3 - d_3$ , 100 MHz):  $\delta$  161.8, 160.7, 158.2 (d,  $J = 250$ , 1C), 154.7, 151.5, 141.3, 134.9, 134.0, 129.4, 128.7, 124.5, 114.3, 110.7, 21.5. HRMS (ESI):  $[\text{M} + \text{H}]^+$ :  $\text{C}_{15}\text{H}_{12}\text{FN}_2$  Calcd for 239.0985. Found: 239.0989.

**5-fluoro-2-pentylquinazoline (4q)**. Slight yellow liquid.  $^1\text{H}$  NMR ( $\text{CDCl}_3 - d_3$ , 400 MHz):  $\delta$  9.52 (s, 1H), 7.67 - 7.75 (m, 2H), 7.10 - 7.14 (m, 1H), 3.04 (t,  $J = 8.0$ , 2H), 1.80 - 1.88 (m, 2H), 1.28 - 1.35 (m,

4H), 0.82 (t,  $J = 8.0$ , 3H).  $^{13}\text{C}$  NMR ( $\text{CDCl}_3 - d_3$ , 100 MHz):  $\delta$  168.8, 158.1 (d,  $J = 250$ , 1C), 154.6, 151.0, 134.0, 123.8, 113.9, 110.6, 39.9, 31.6, 28.5, 22.5, 13.9. HRMS (ESI):  $[\text{M} + \text{H}]^+$ :  $\text{C}_{13}\text{H}_{16}\text{FN}_2$  Calcd for 219.1298. Found: 219.1292.

**2-((benzylamino)methyl)aniline (5)**. Slight yellow liquid.  $^1\text{H}$  NMR ( $\text{CDCl}_3 - d_3$ , 400 MHz):  $\delta$  7.27 - 7.39 (m, 5H), 7.13 (t,  $J = 8.0$  Hz, 1H), 7.06 (d,  $J = 8.0$  Hz, 1H), 6.69 - 6.73 (m, 2H), 4.74 (br, 2), 3.86 (s, 2H), 3.82 (s, 2H), 1.52 (br, 1 H).  $^{13}\text{C}$  NMR ( $\text{CDCl}_3 - d_3$ , 100 MHz):  $\delta$  146.9, 140.2, 129.9, 128.5, 128.4, 128.1, 127.0, 123.8, 117.7, 115.7, 53.2, 52.4. HRMS (ESI):  $[\text{M} + \text{H}]^+$ :  $\text{C}_{14}\text{H}_{17}\text{N}_2$  Calcd for 213.1392. Found: 213.1377.

**2-phenyl-4H-benzo[d][1,3]oxazine (9)**. White solid, mp: 91 °C - 92 °C (lit.<sup>2</sup> 92 °C - 93 °C).  $^1\text{H}$  NMR ( $\text{CDCl}_3 - d_3$ , 400 MHz):  $\delta$  8.13 (d,  $J = 8.0$ , 2H), 7.41 - 7.51 (m, 3H), 7.25 - 7.34 (m, 2H), 7.16 - 7.20 (m, 1H), 7.01 (d,  $J = 8.0$ , 2H).  $^{13}\text{C}$  NMR ( $\text{CDCl}_3 - d_3$ , 100 MHz):  $\delta$  157.6, 139.7, 132.3, 131.4, 128.9, 128.2, 128.0, 126.4, 124.6, 123.7, 122.3, 66.4. HRMS (ESI):  $[\text{M} + \text{H}]^+$ :  $\text{C}_{14}\text{H}_{17}\text{N}_2$  Calcd for 213.1392. Found: 213.1377.

**2-phenyl-2,4-dihydro-1H-benzo[d][1,3]oxazine (10)**. White solid, mp: 117 °C - 118 °C (lit.<sup>7</sup> 116 °C - 117 °C).  $^1\text{H}$  NMR ( $\text{CDCl}_3 - d_3$ , 400 MHz):  $\delta$  7.57 (d,  $J = 8.0$ , 2H), 7.40 - 7.44 (m, 3H), 7.11 (t,  $J = 8$ , 1H), 6.98 (d,  $J = 8.0$ , 1H), 6.85 (t,  $J = 8$ , 1H), 6.72 (d,  $J = 8.0$ , 1H), 5.59 (d,  $J = 4.0$ , 1H), 5.13 (d,  $J = 16.0$ , 1H), 4.95 (d,  $J = 16.0$ , 1H), 4.12 (br, 1H).  $^{13}\text{C}$  NMR ( $\text{CDCl}_3 - d_3$ , 100 MHz):  $\delta$  141.6, 139.1, 129.1, 128.6, 127.4, 126.5, 125.0, 122.2, 119.8, 117.1, 85.2, 67.6. HRMS (ESI):  $[\text{M} + \text{H}]^+$ :  $\text{C}_{14}\text{H}_{14}\text{NO}$  Calcd for 212.1075. Found: 212.1077.

## Reference

- 1 J. Sinkkonen, K. N. Zelenin, A. K. A. Potapov, I. V. Lagoda, V. V. Alekseyev and K. Pihlaja, *Tetrahedron*, 2003, **59**, 1939
- 2 C. U. Maheswari, G. S. Kumar, M. Venkateshwar, R. A. Kumar, M. L. Kantam and K. R. Reddy, *Adv. Synth. Catal.*, 2010, **352**, 341
- 3 B. Han, X. L. Yang, C. Wang, Y. W. Bai, T. C. Pan, X. Chen and W. Yu, *J. Org. Chem.*, 2012, **77**, 1136.
- 4 C. Necdet and C. Meliha, *Tetrahedron*, 2007, **63**, 2966.
- 5 F. Portela-Cubillo, J. S. Scott and J. C. Walton, *J. Org. Chem.*, 2009, **74**, 4934
- 6 M. Chakrabarty, A. K. Chakravarty and S. C. Pakrashi, *Heterocycles*, 1983, **20**, 445.
- 7 S. Yotphan, R. G. Bergman and J. A. Ellman, *Org. Lett.*, 2009, **11**, 1511.

## $^1\text{H}$ and $^{13}\text{C}$ NMR Spectra of 3, 4, 5, 9 and 10

3a

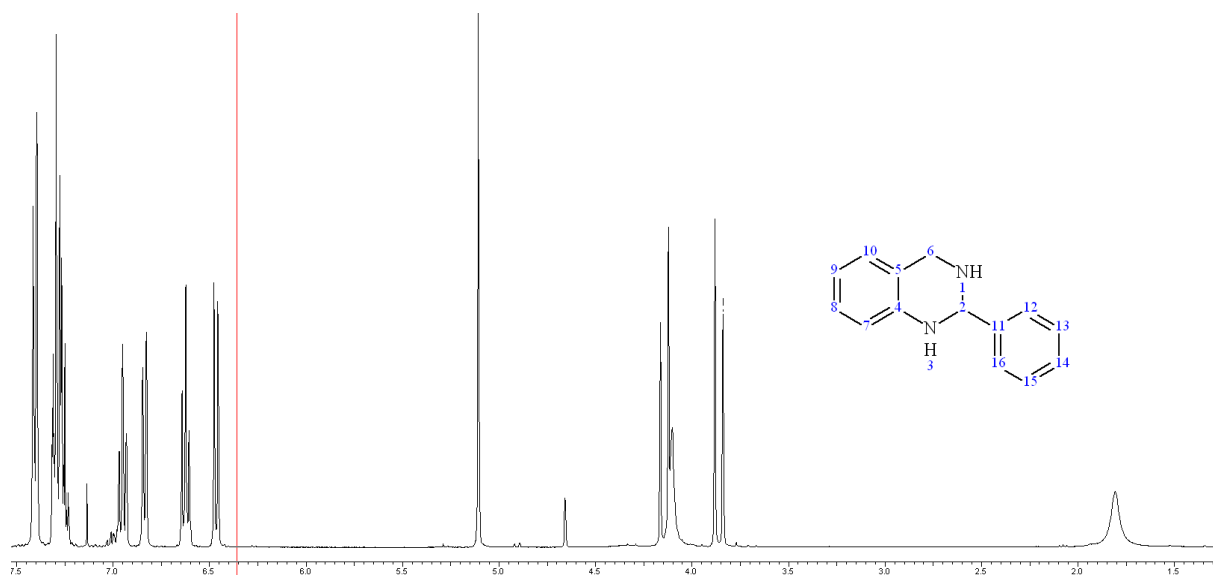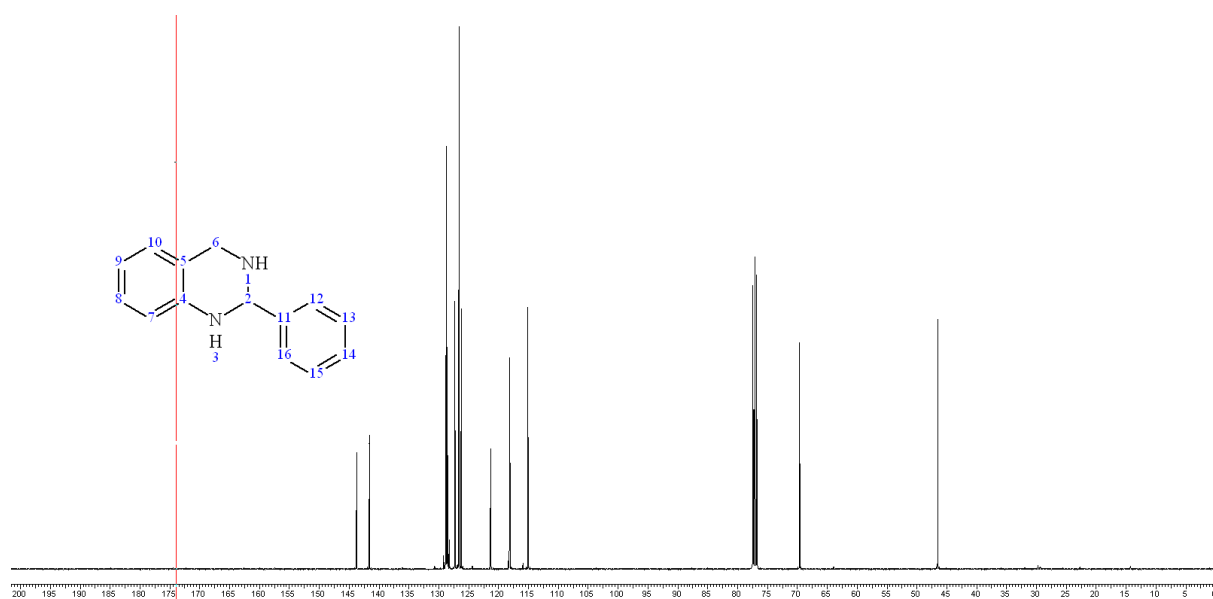



4a

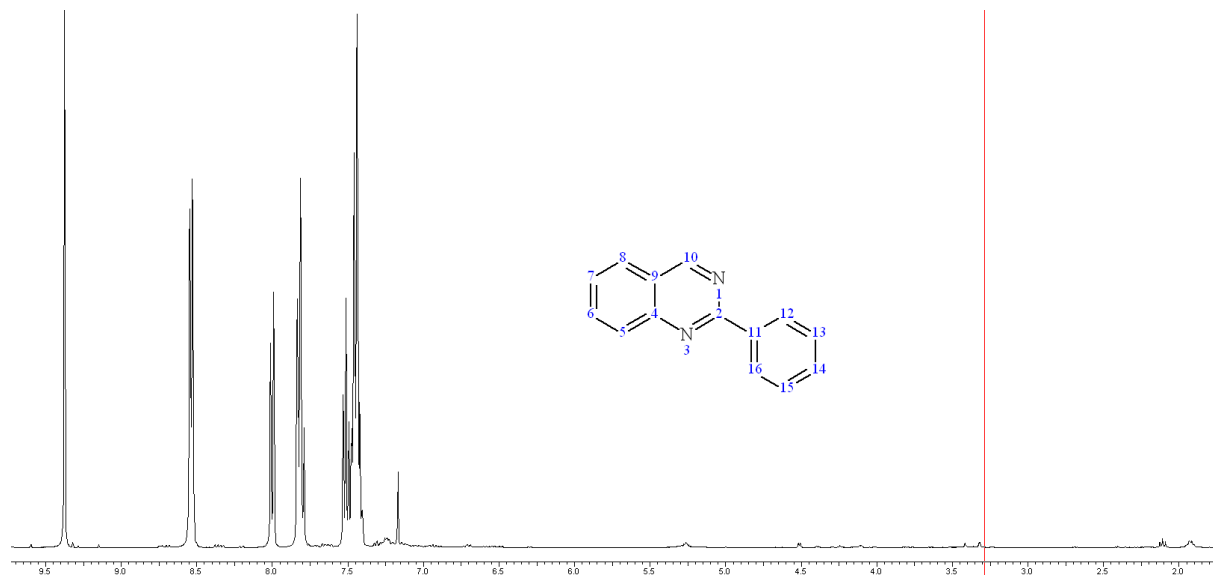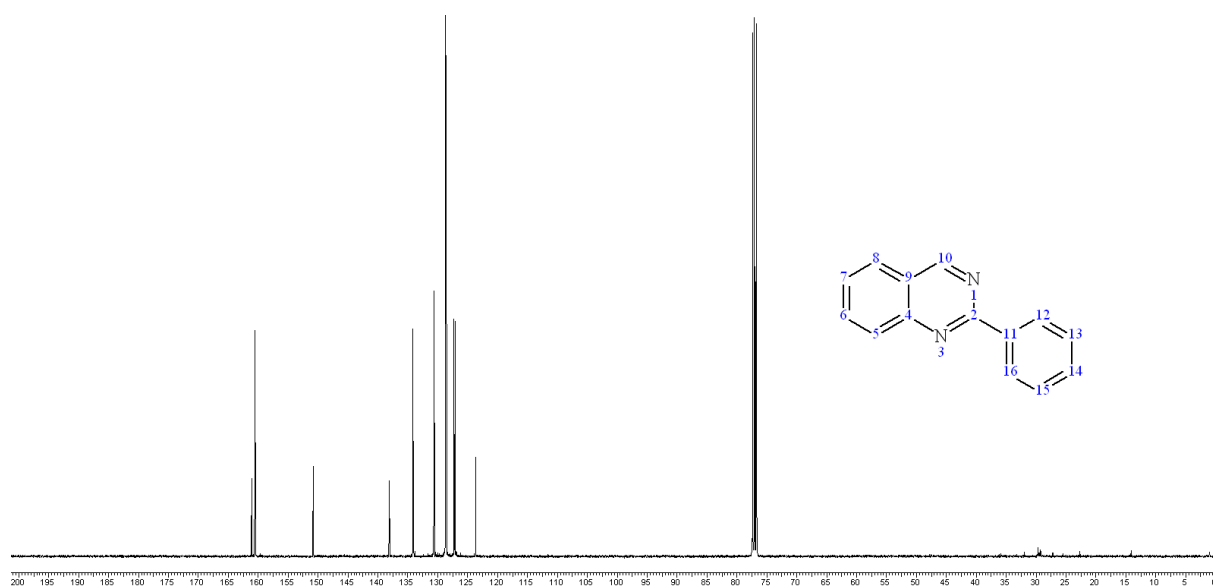

4b

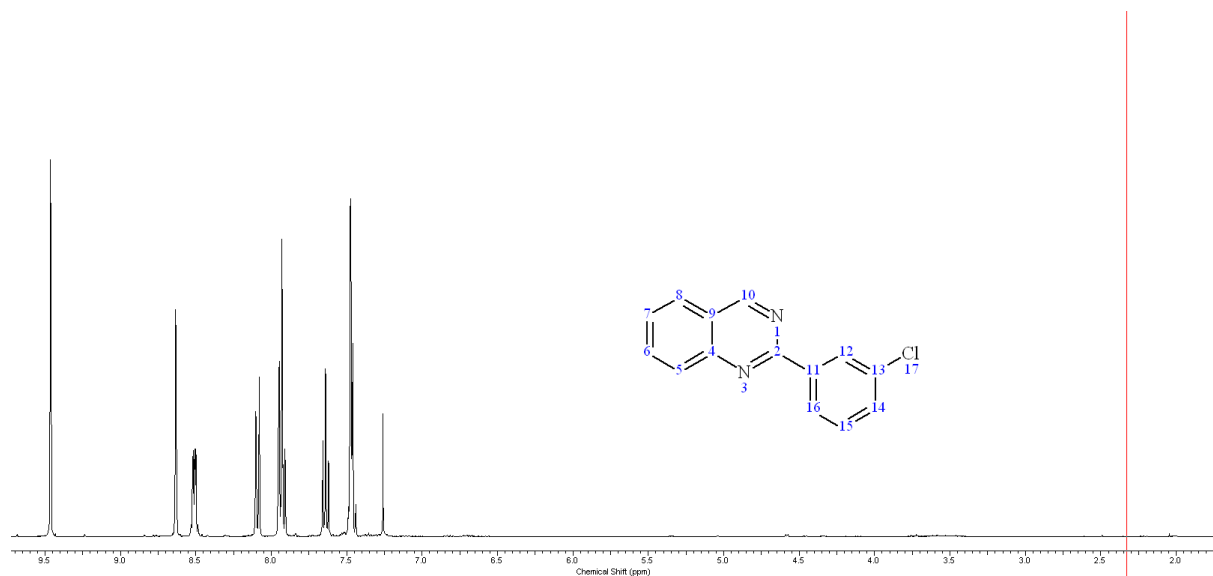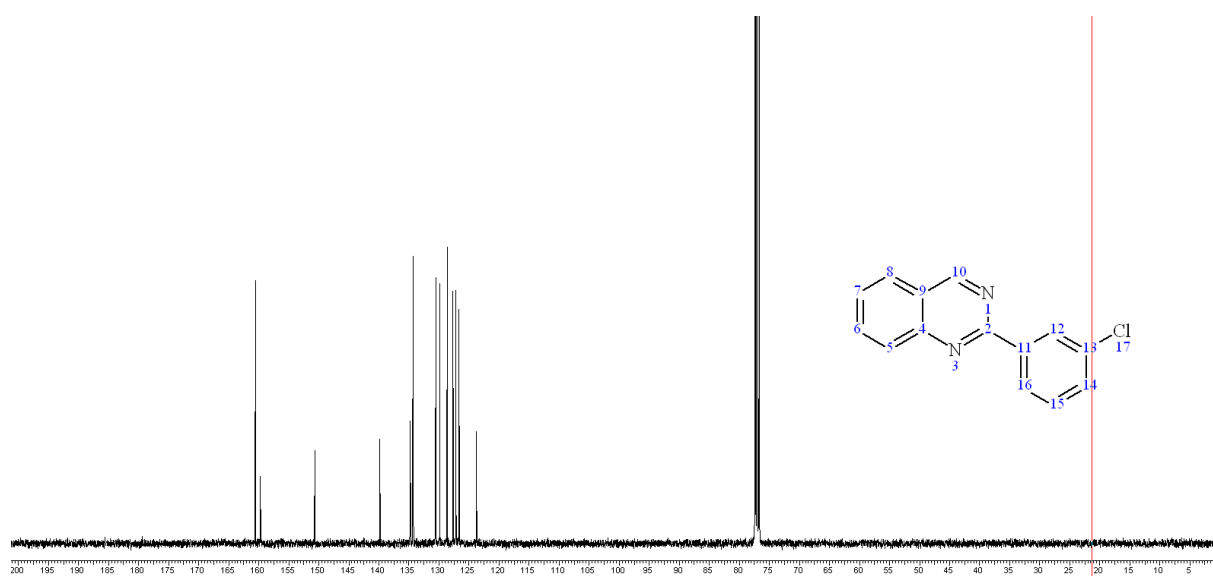

4c

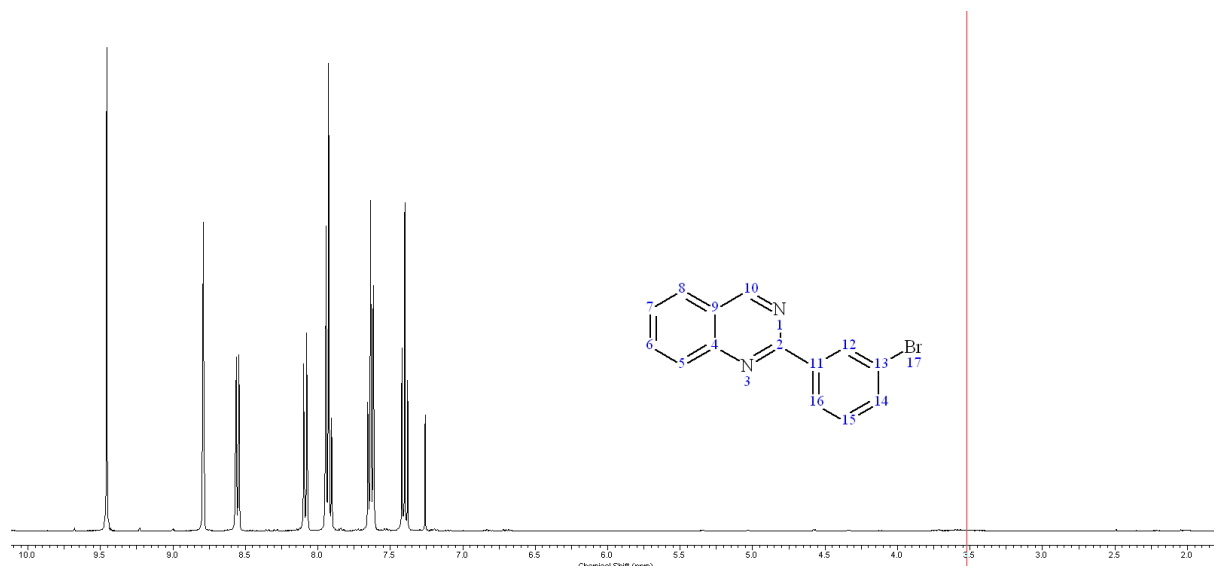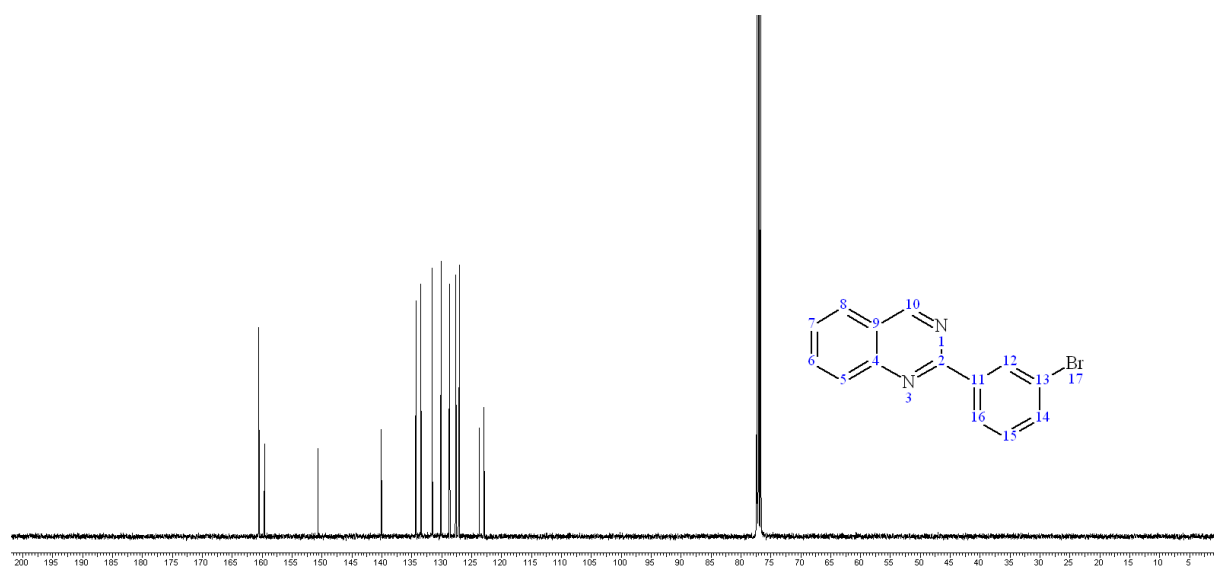

4d

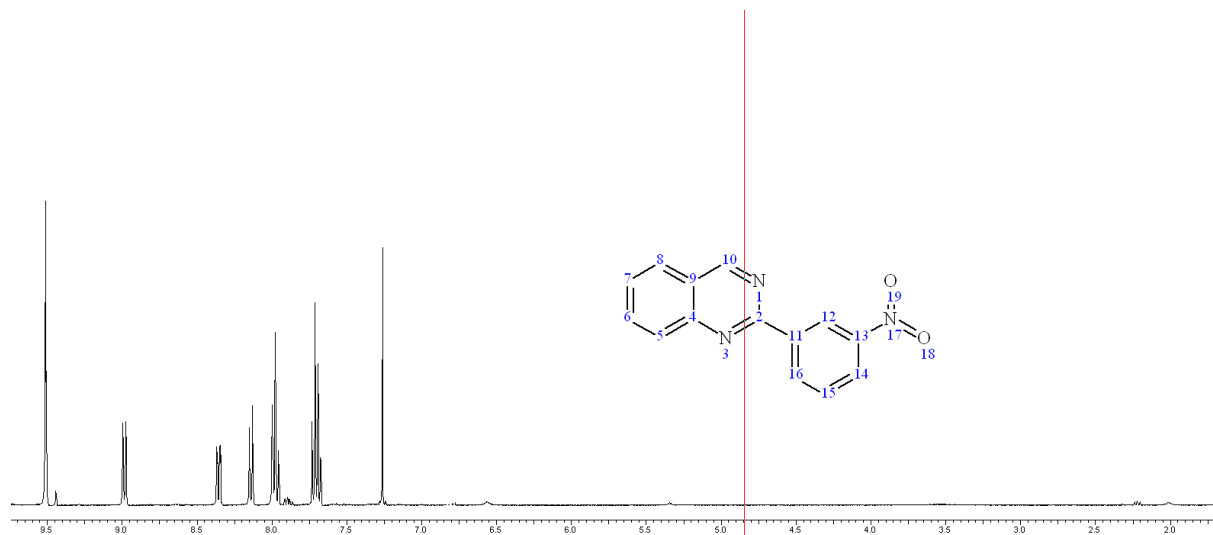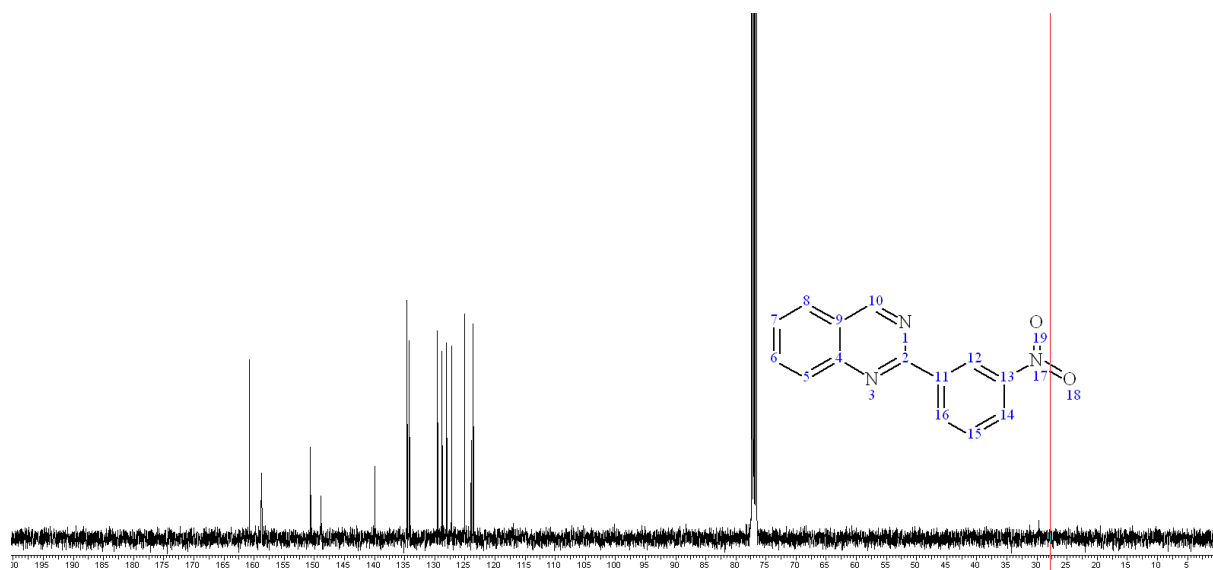

4e

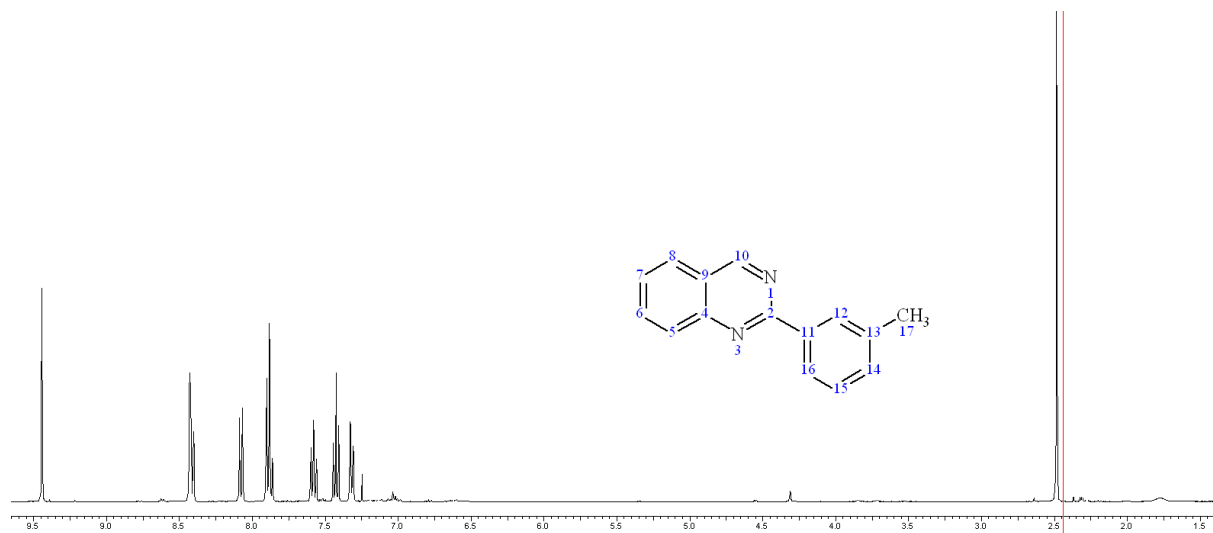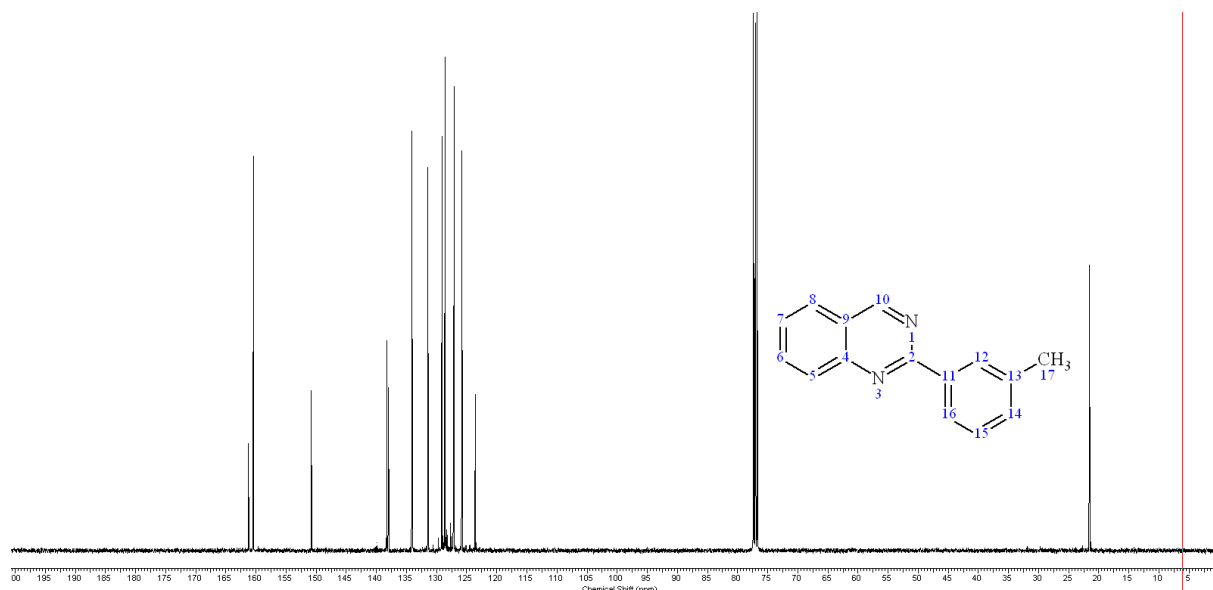

4f

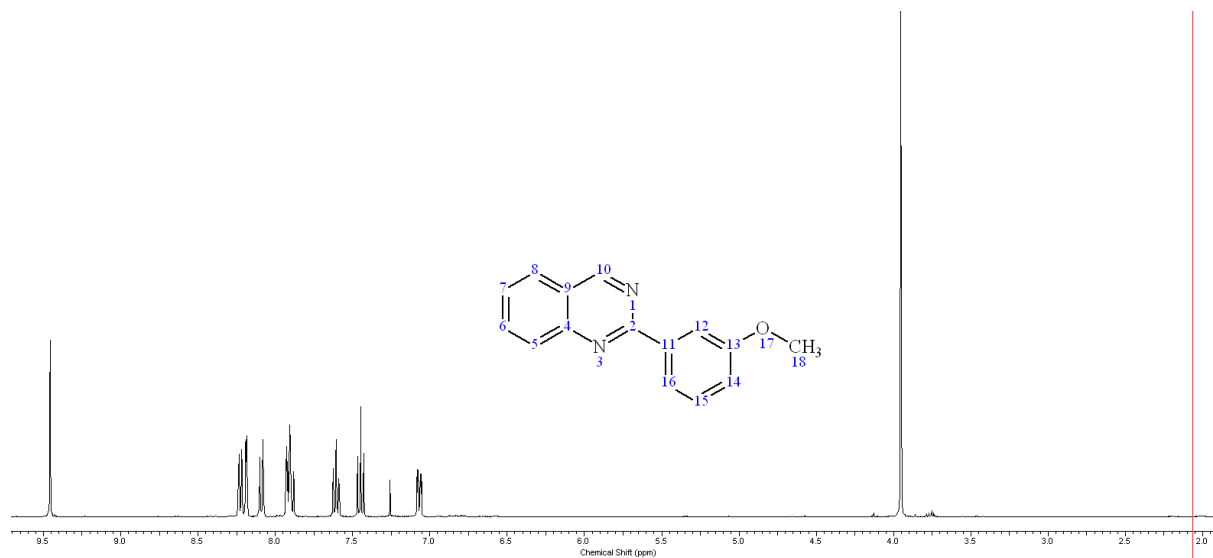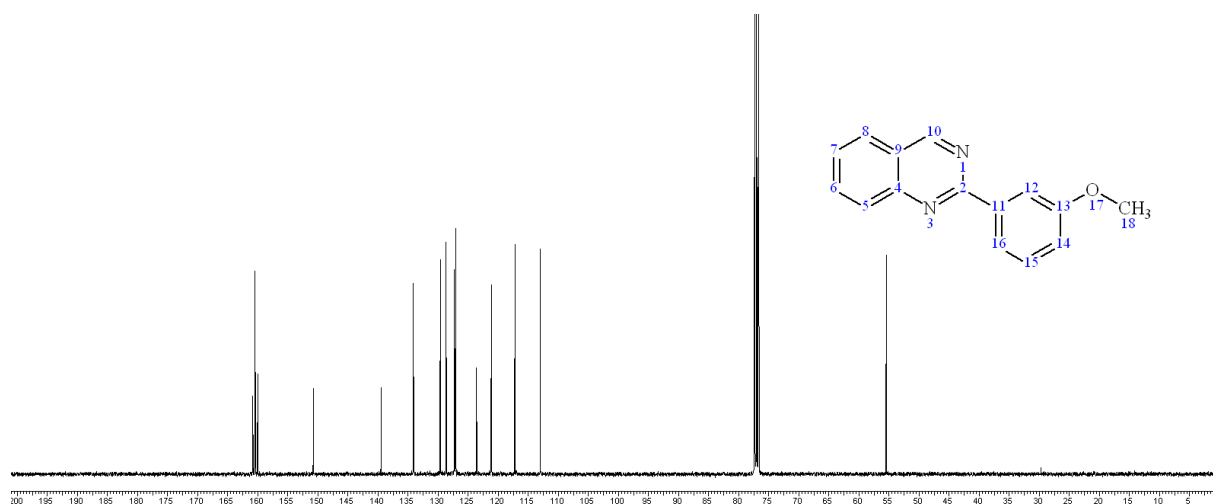

4g

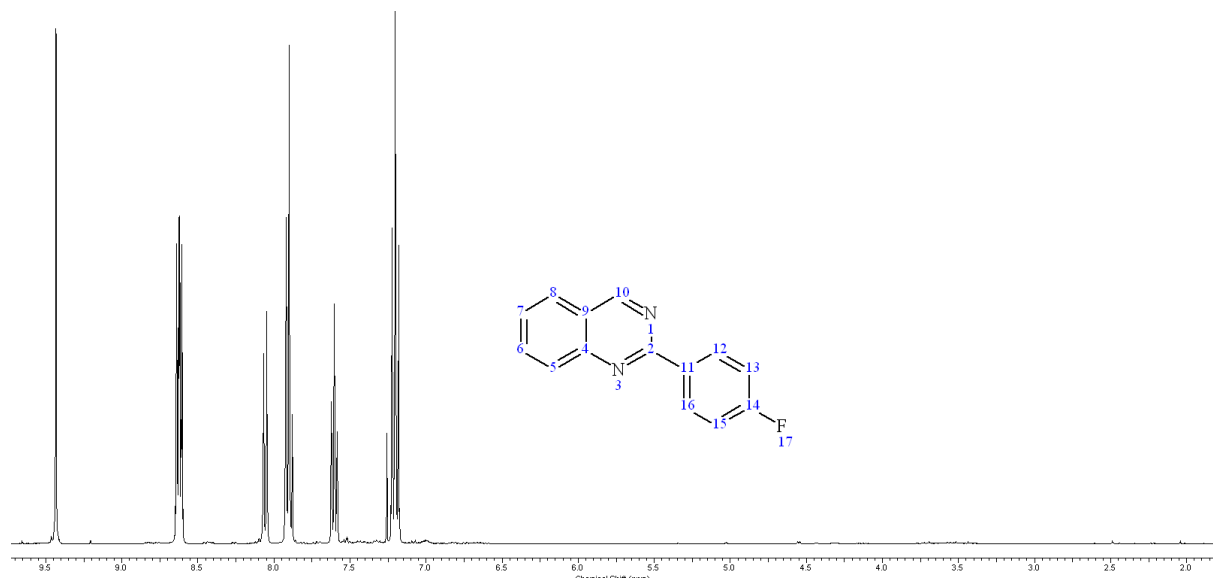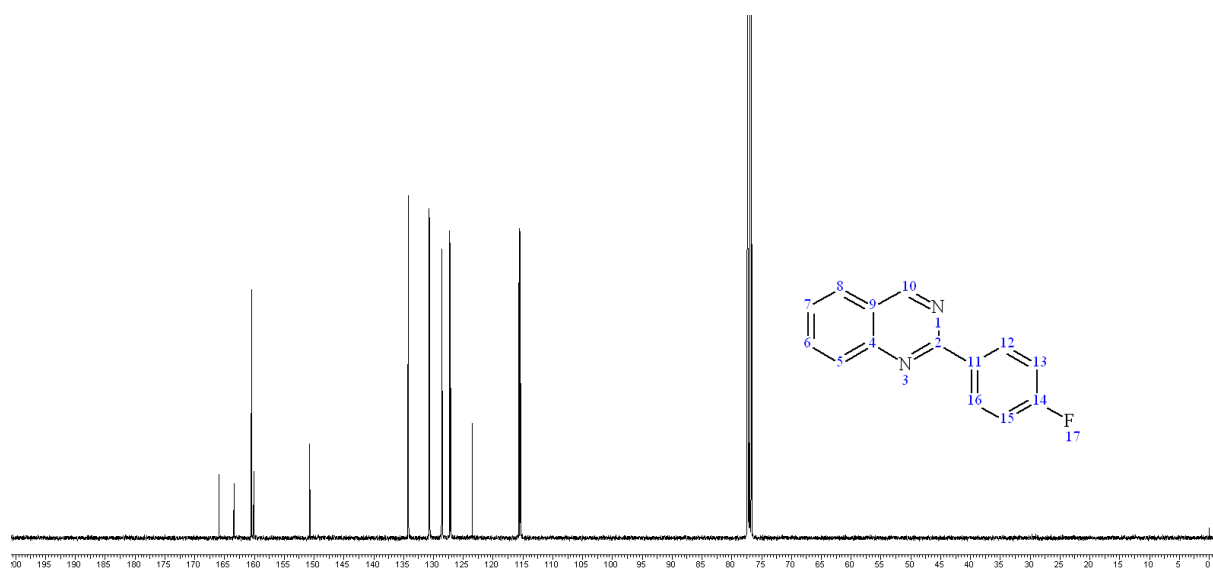

4h

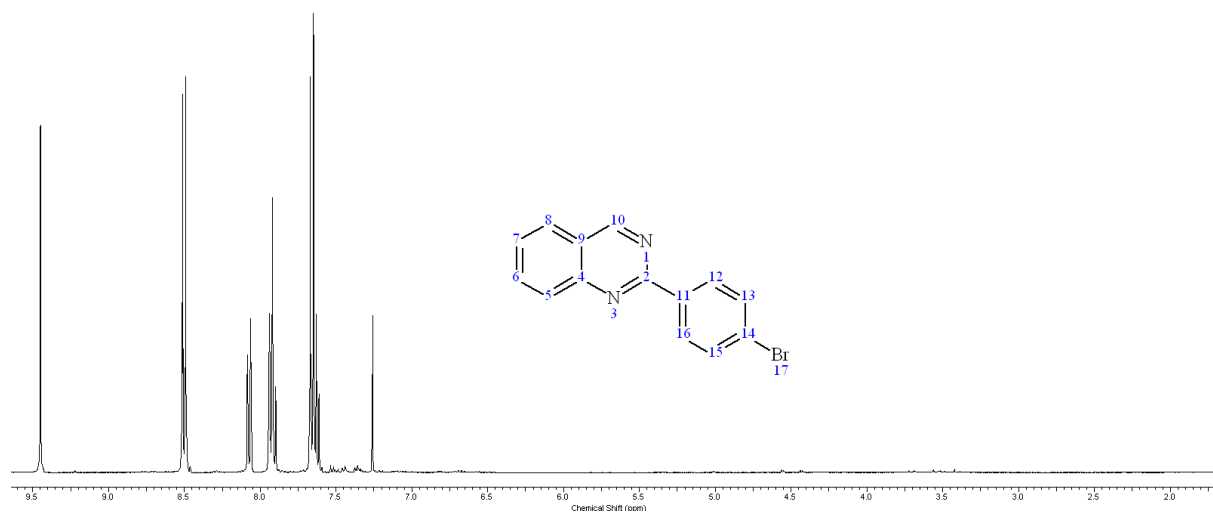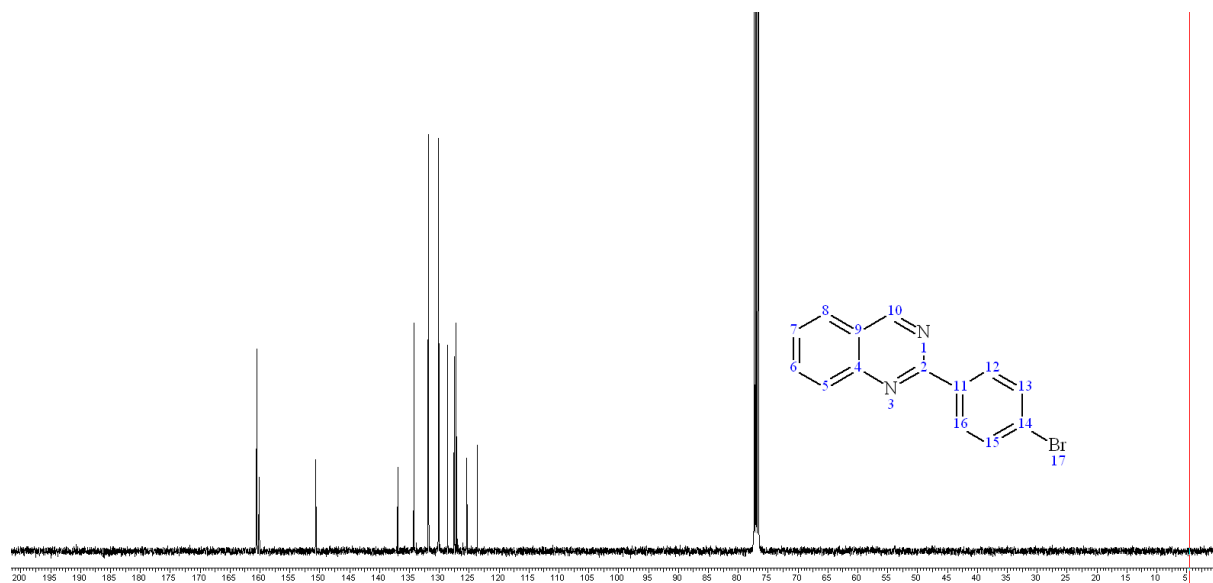



4i

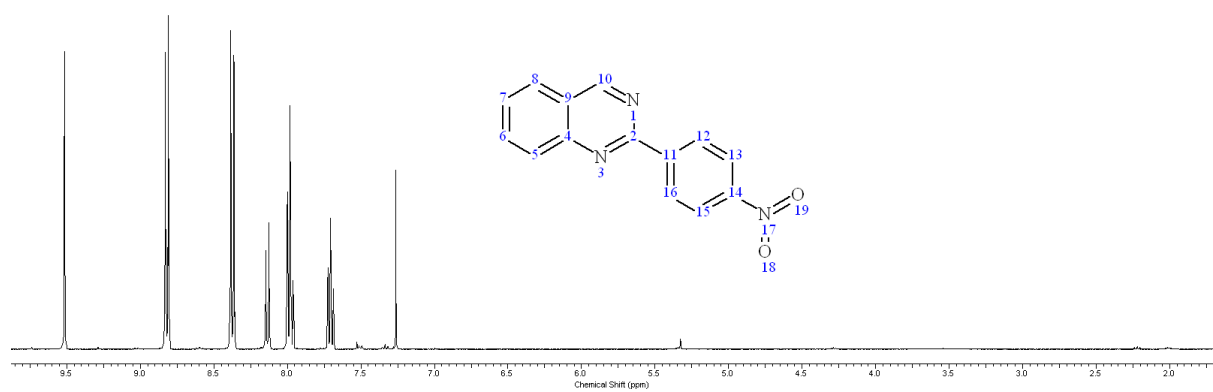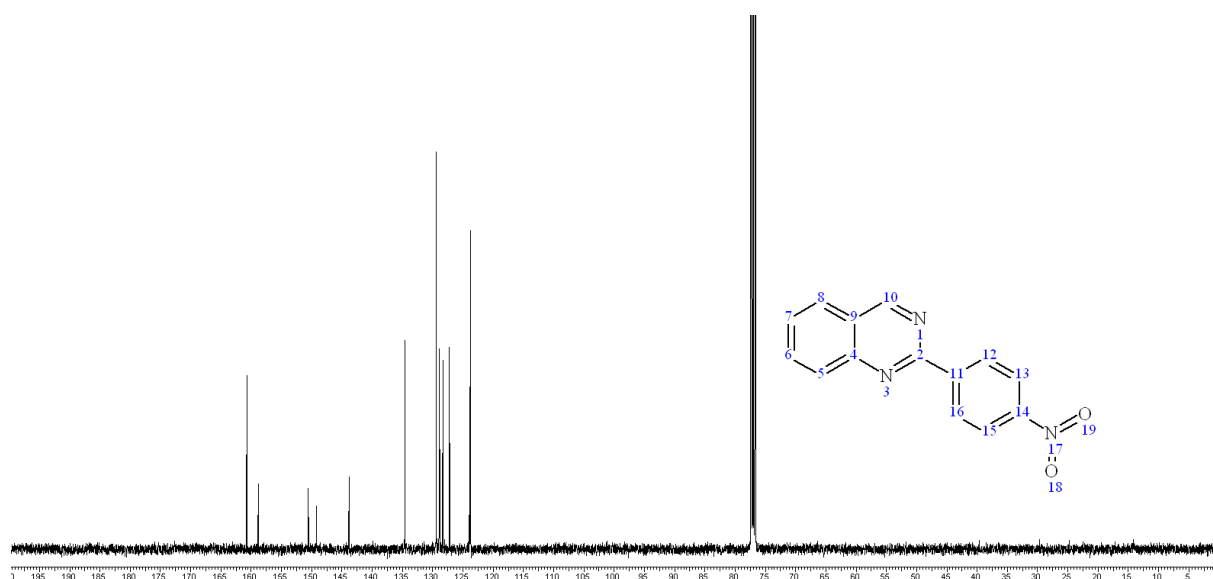

4j

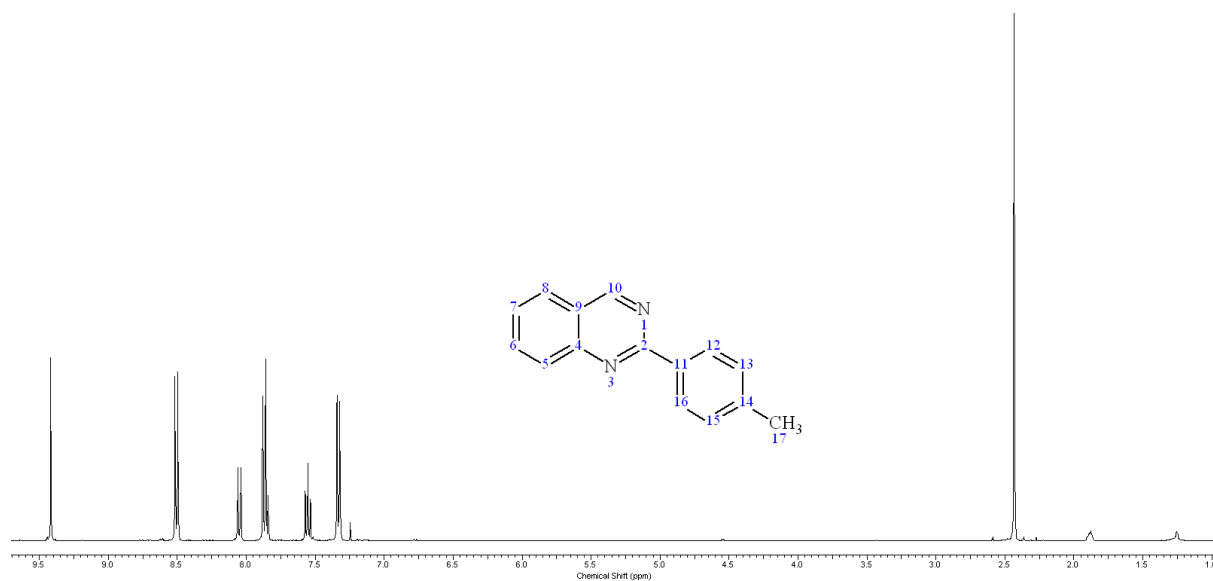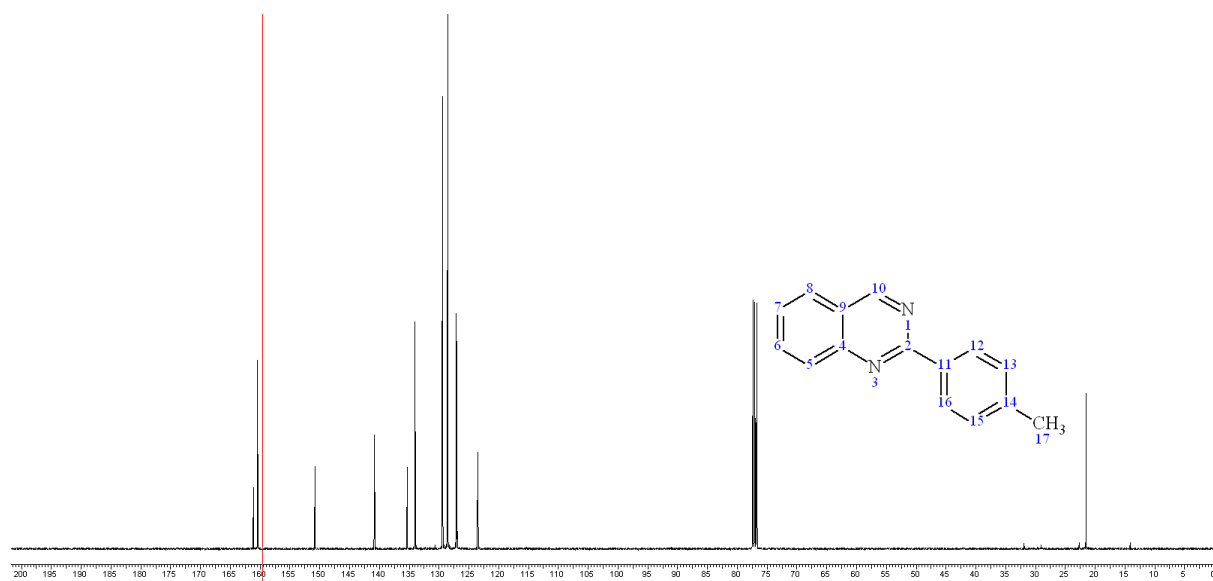

4k

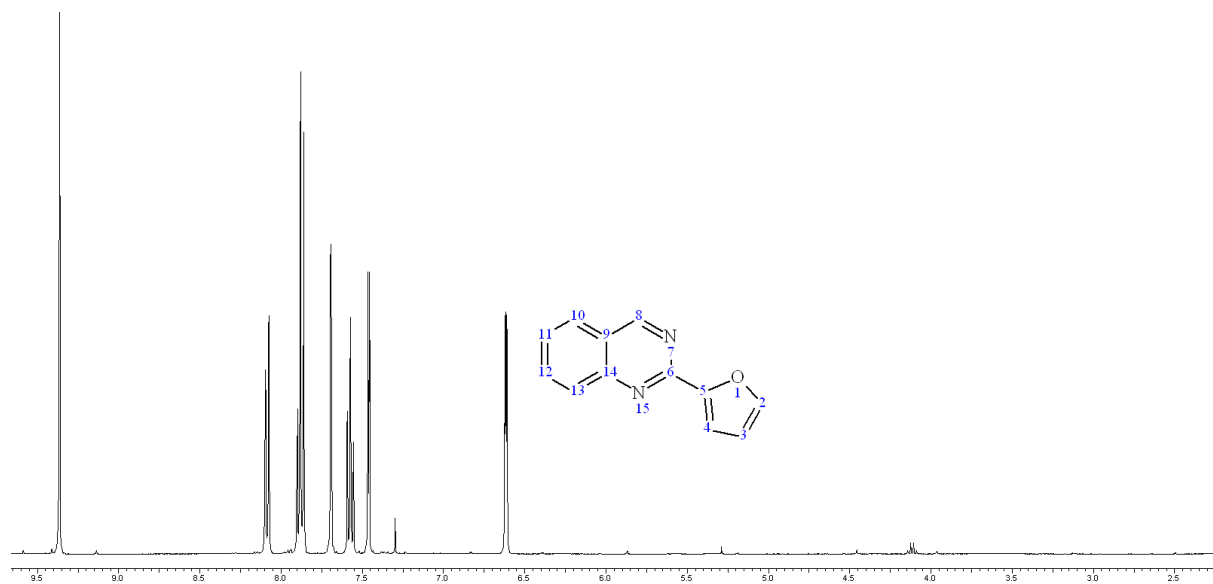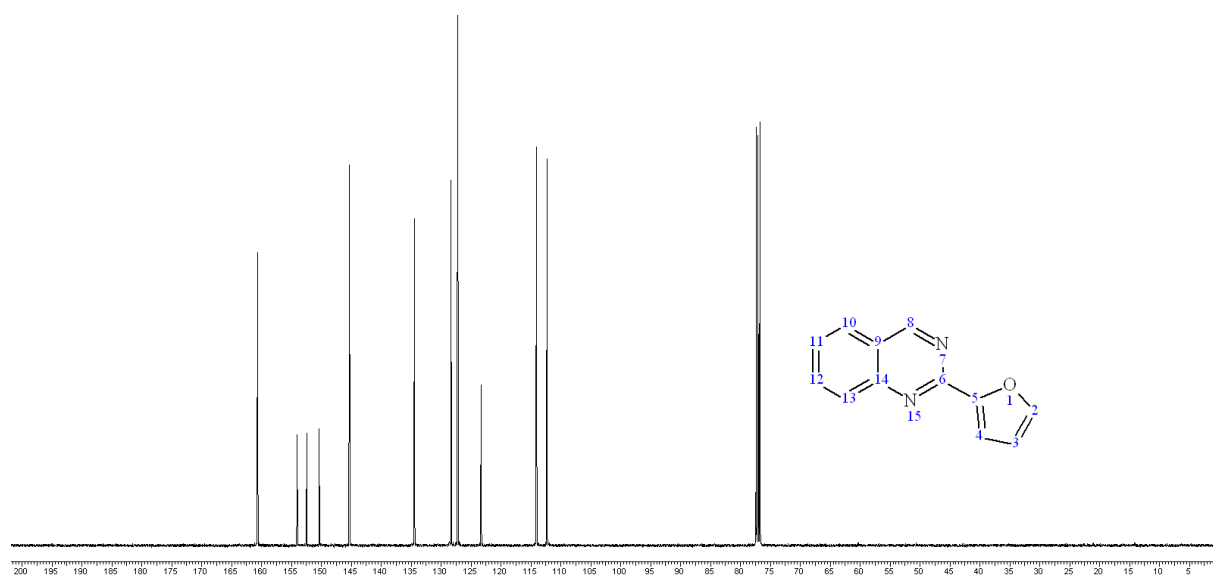

41

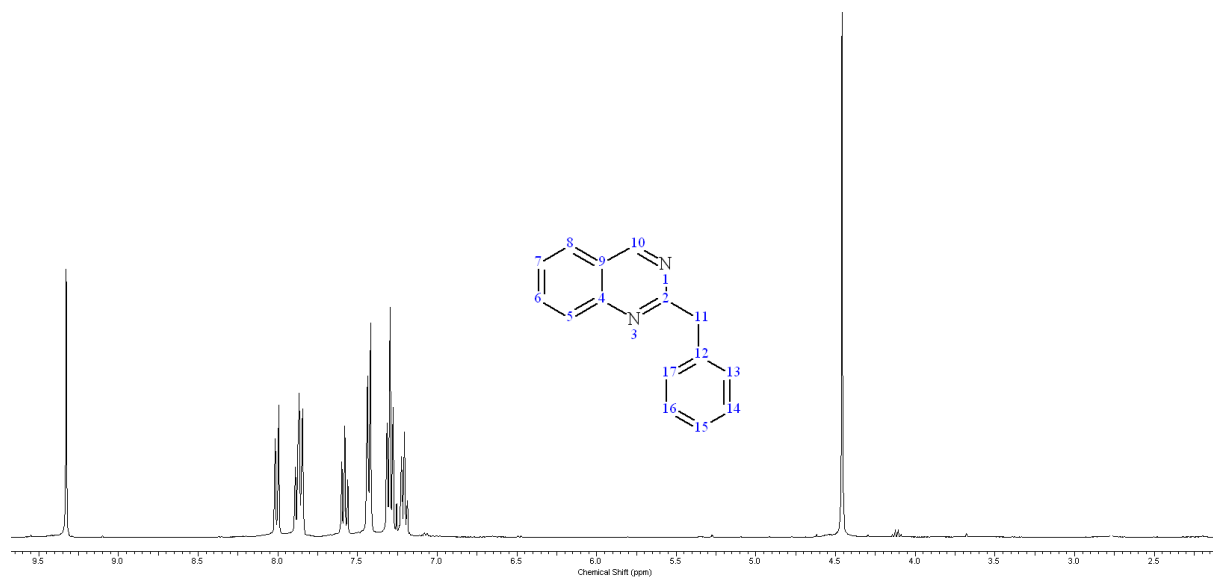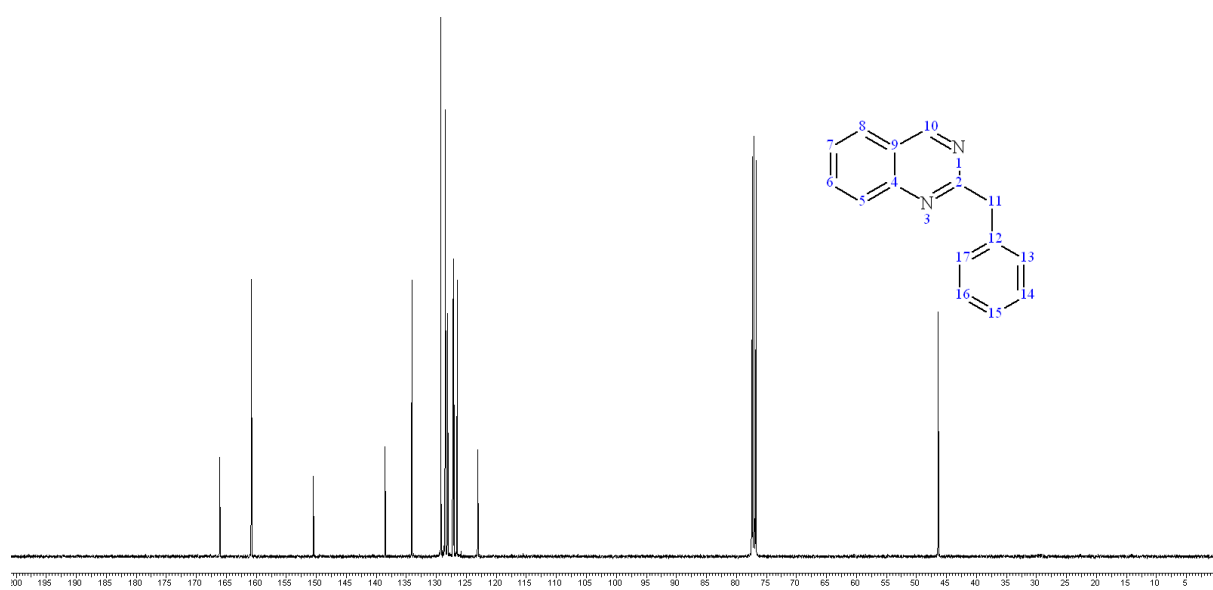

4m

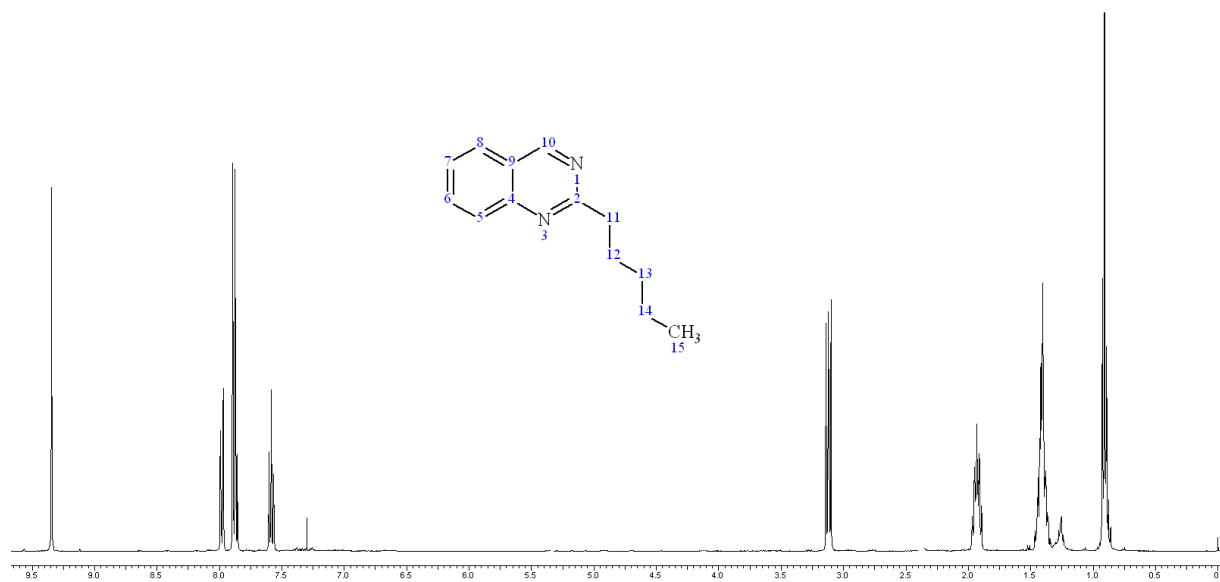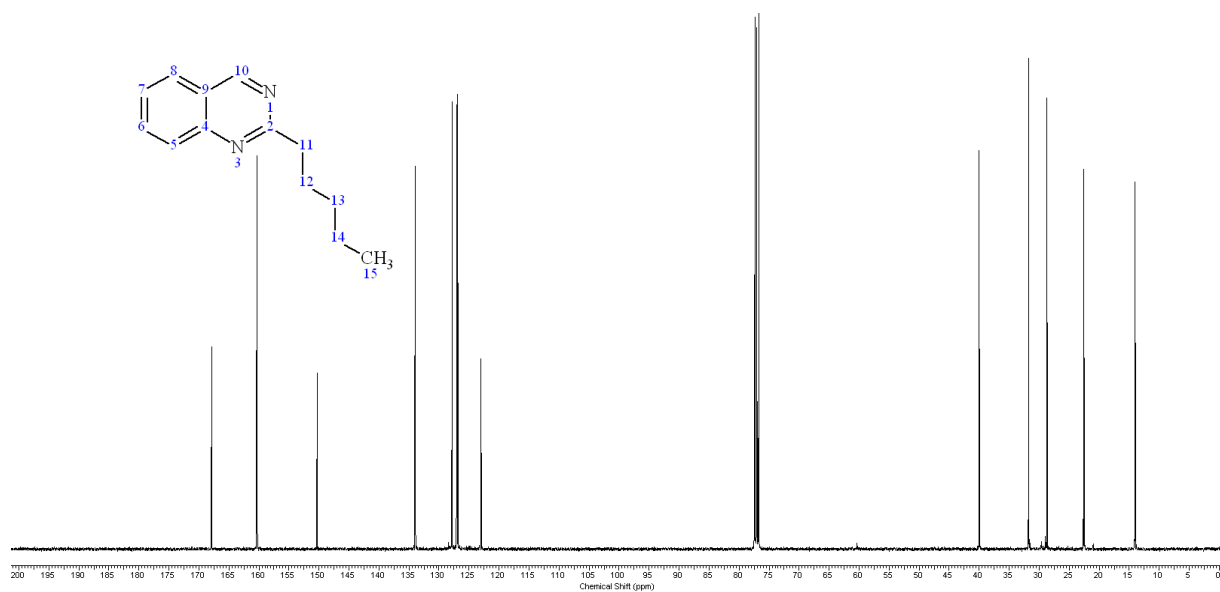

**4n**

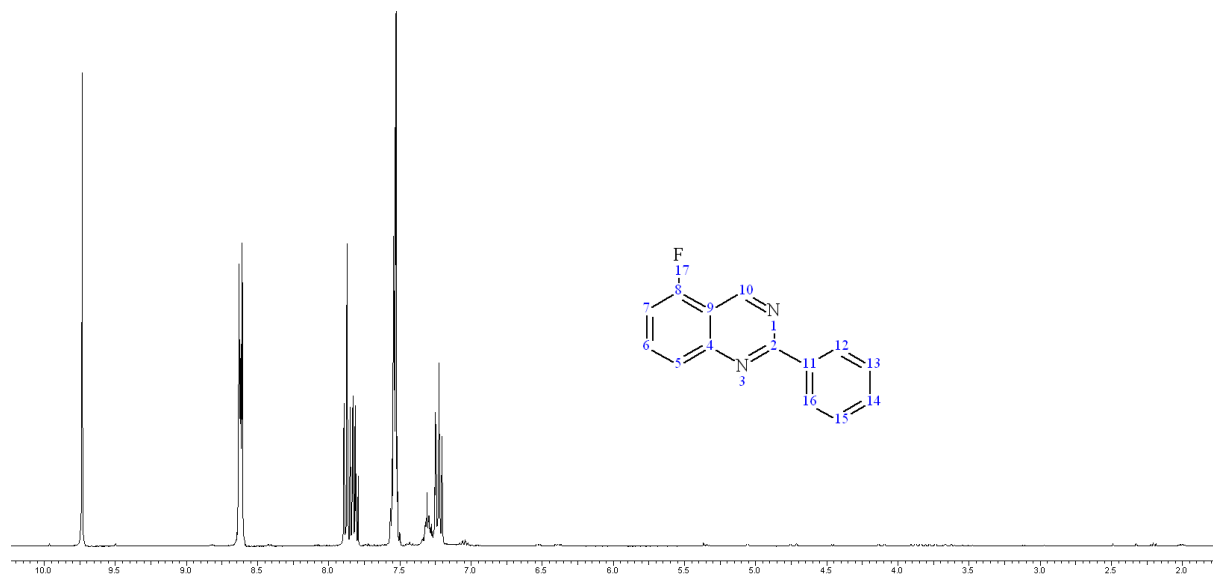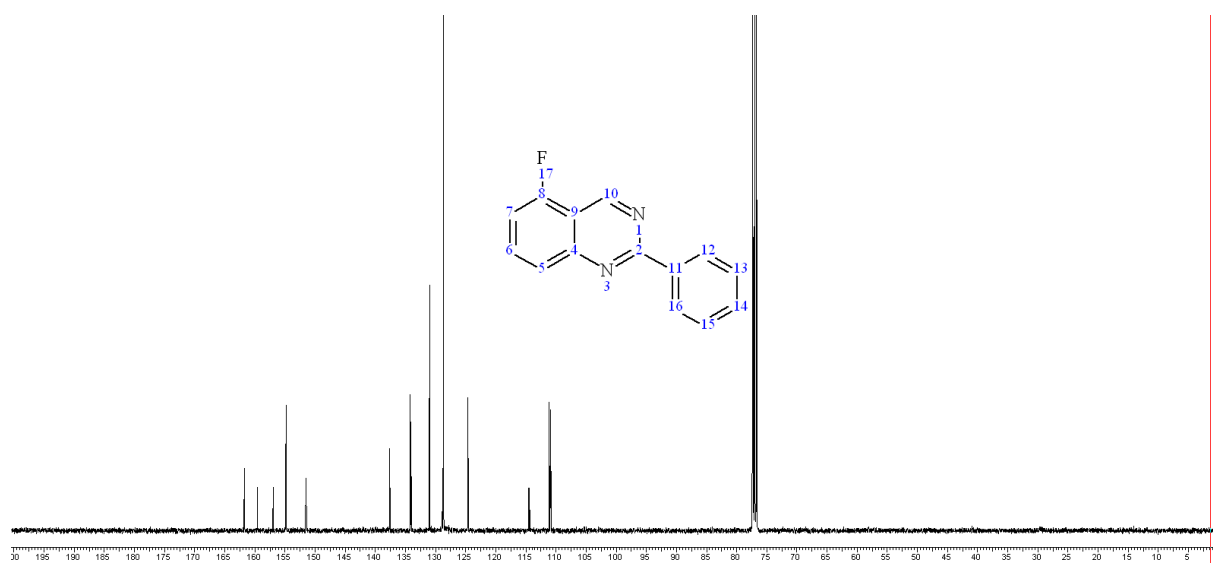

4o

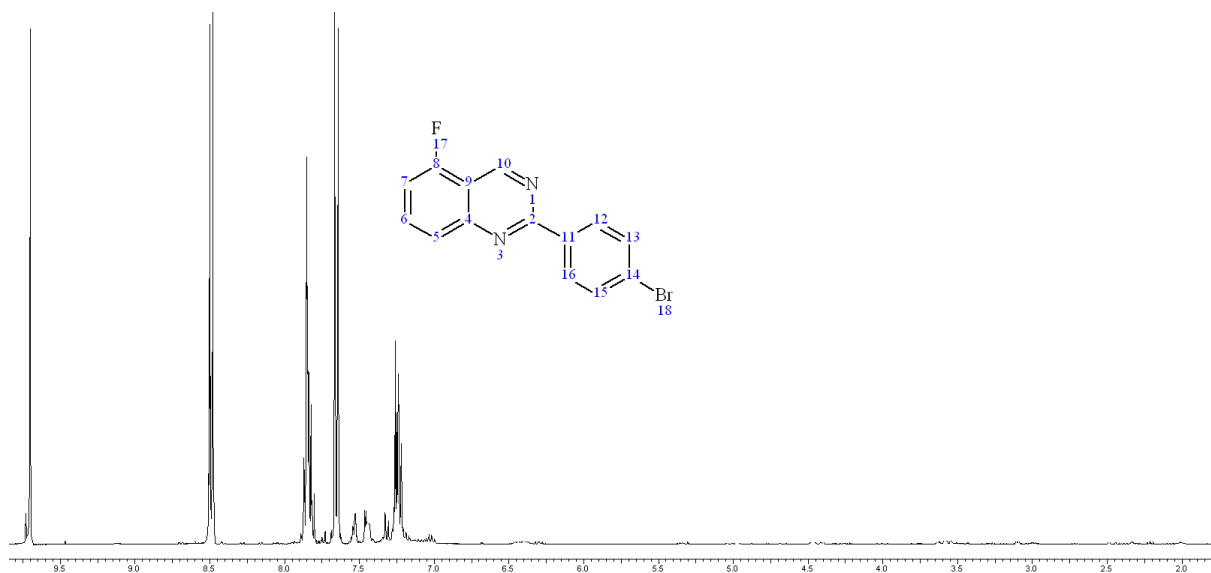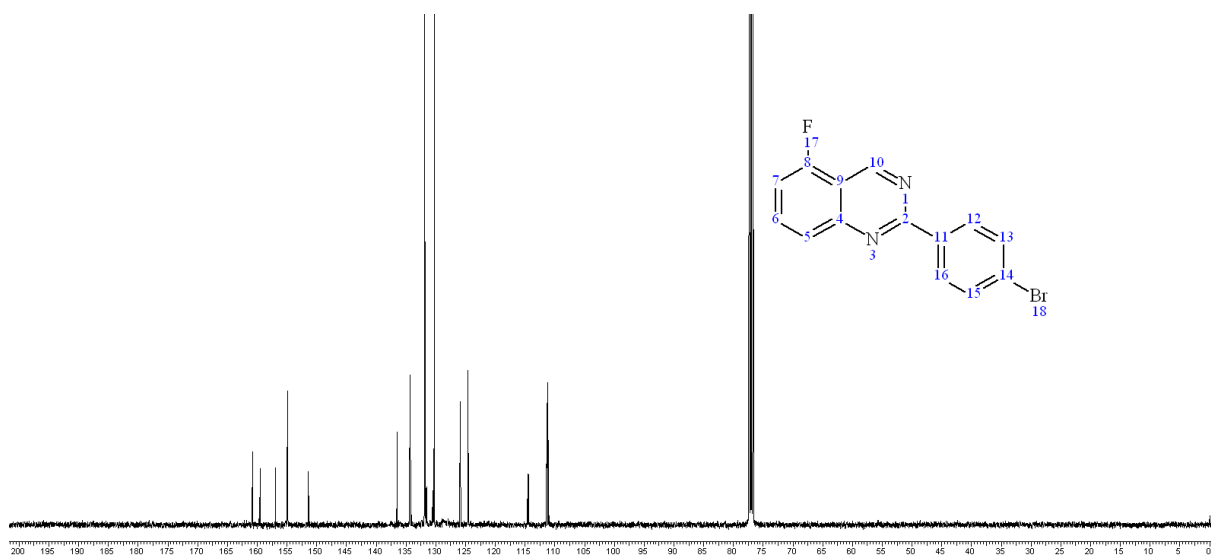

4p

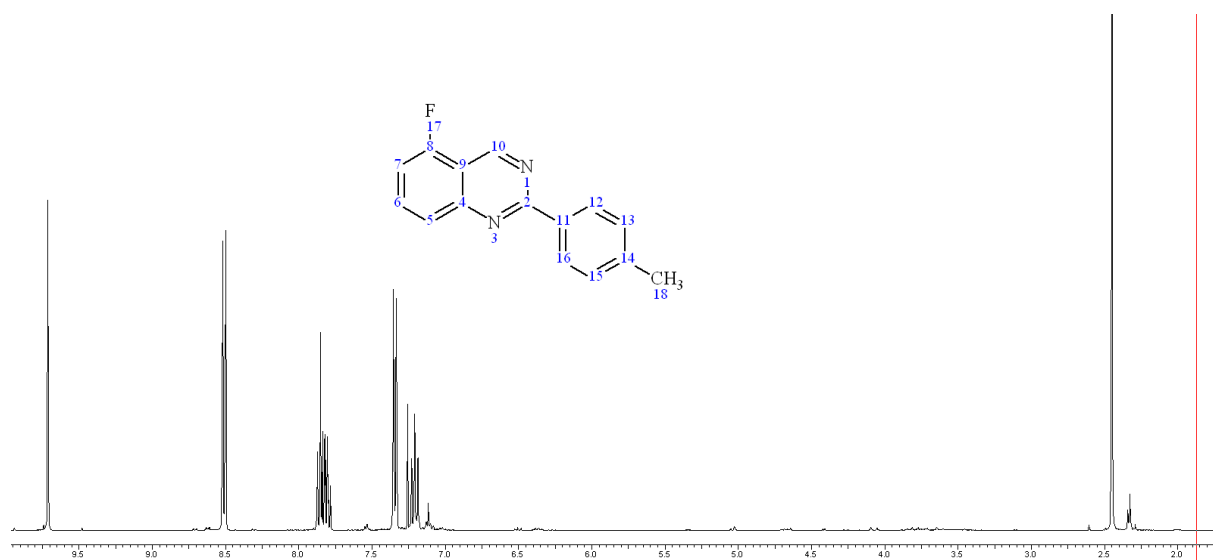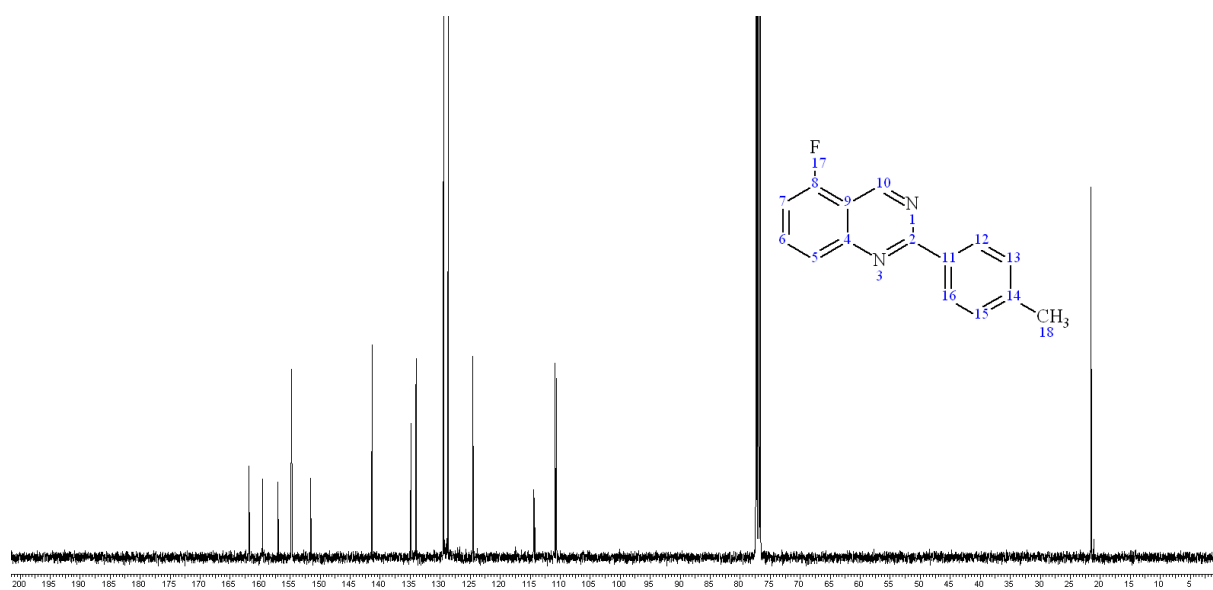



4q

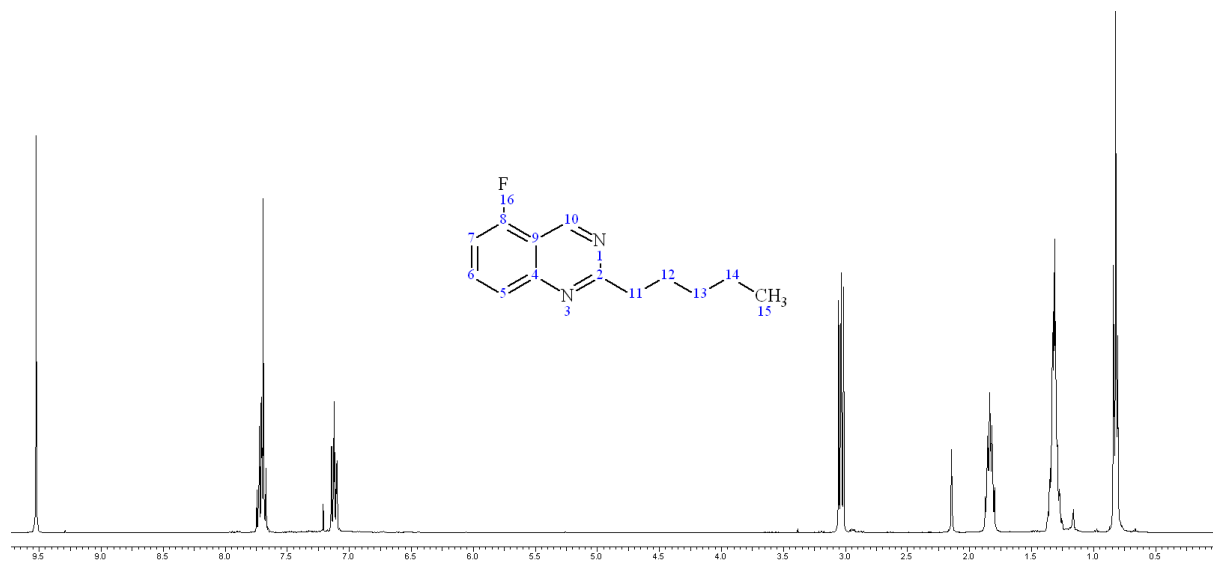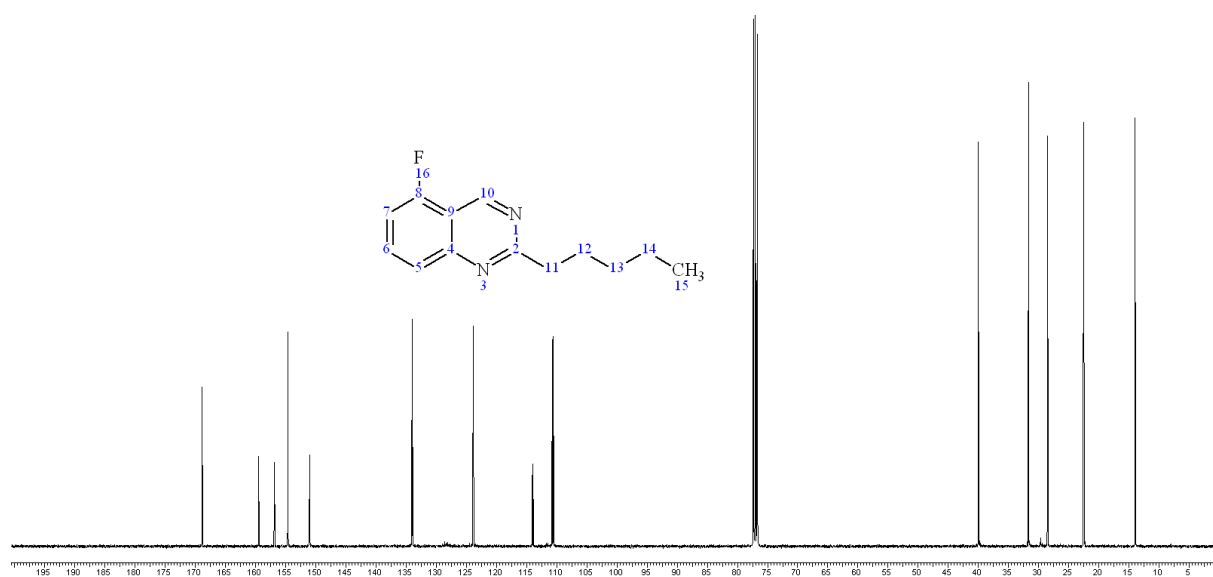

5

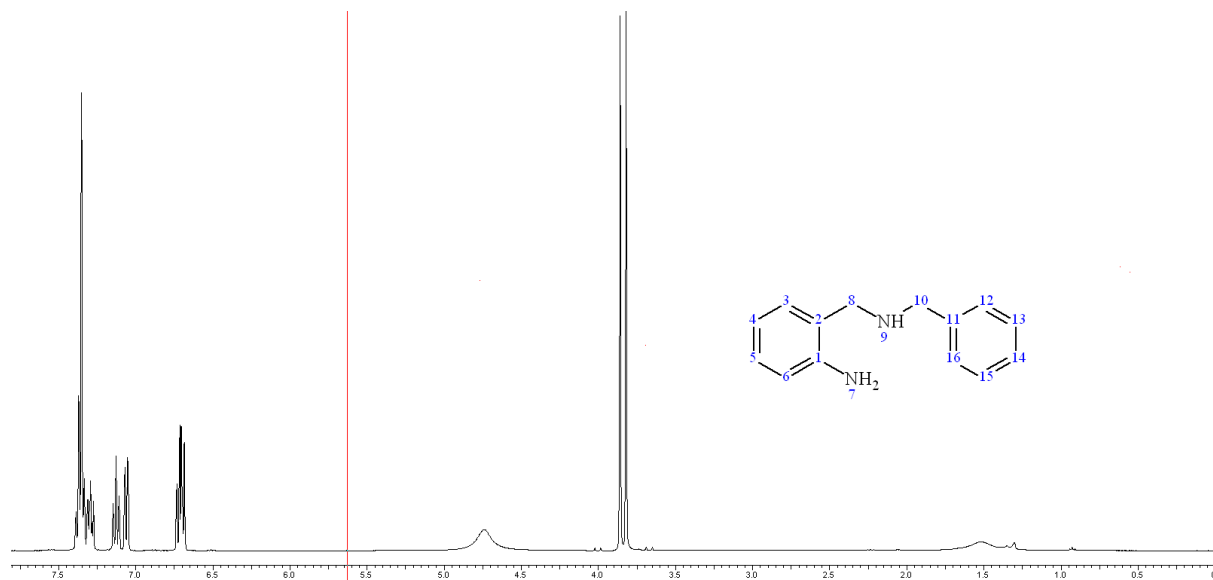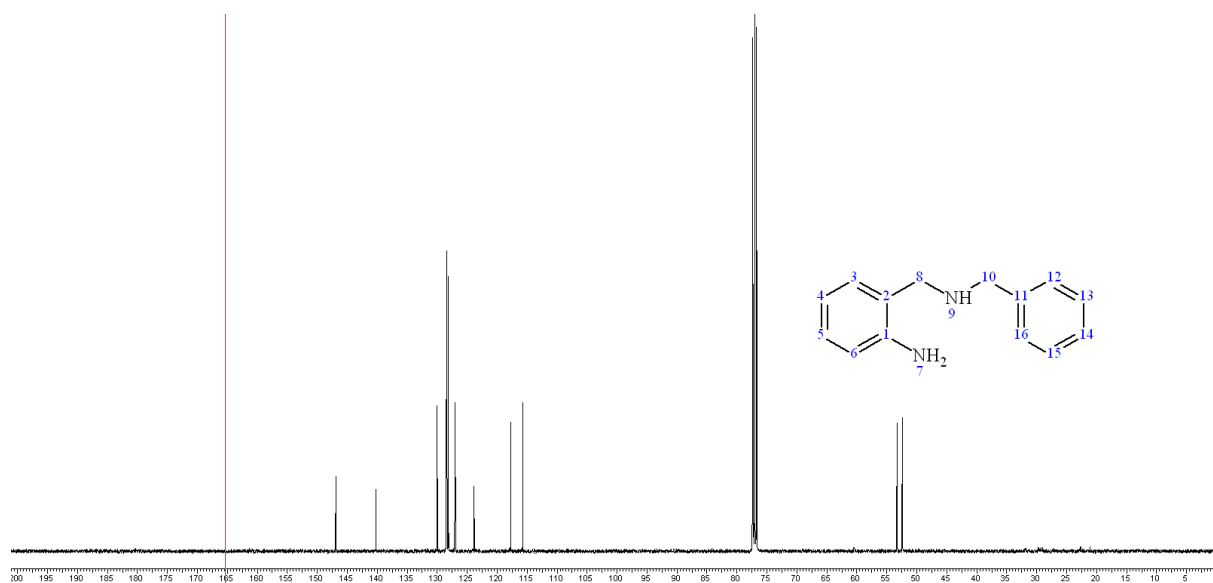

9

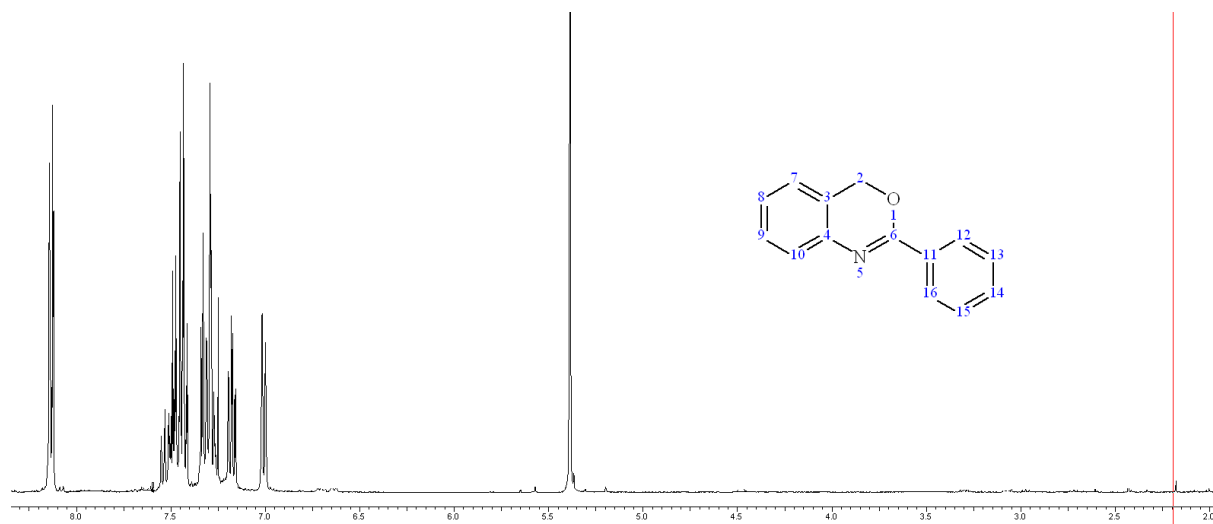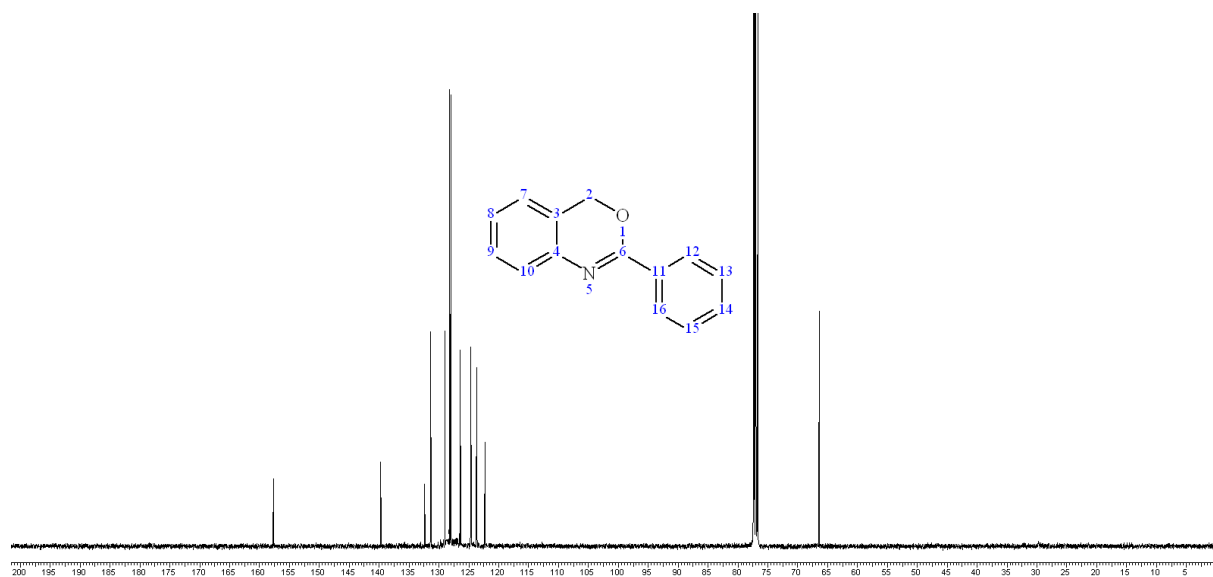

10

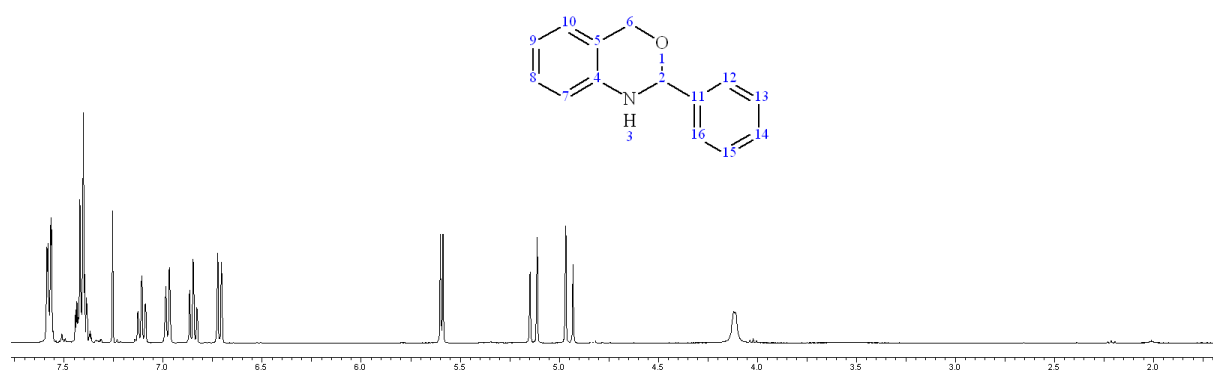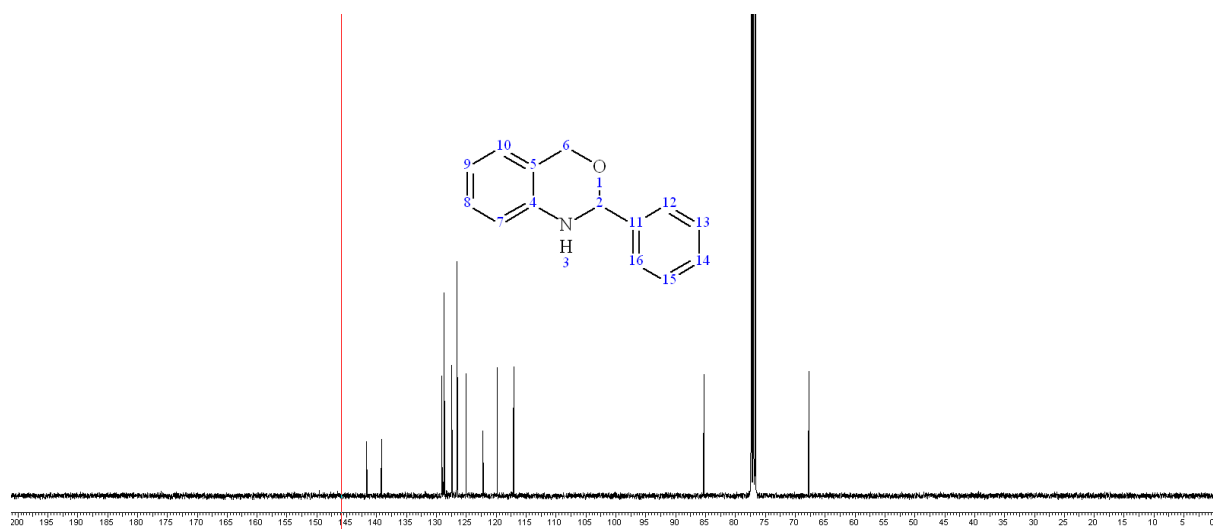

Supplement: c2ra22278g.pdf [file c2ra22278g.pdf]
